# Supplementary material for: The base-free multicomponent polymerization of elemental sulfur, difluoromethylene phosphobetaine and amines toward electron-deficient aromatic polythioureas
Source: Royal Society of Chemistry journal article supplement (doi:10.1039/d4py01387e), 2025-01-01
Supplement: d4py01387e1.pdf [file d4py01387e1.pdf]

# The Base-free Multicomponent Polymerization of Elemental Sulfur, Difluoromethylene Phosphobetaine and Amines Toward Electron-Deficient Aromatic Polythioureas

Yongjiang Yu,<sup>a</sup> Wang Chen,<sup>a</sup> Rongrong Hu,<sup>a,\*</sup> Ben Zhong Tang<sup>b,c</sup>

<sup>a</sup>State Key Laboratory of Luminescent Materials and Devices, Guangdong Provincial Key Laboratory of Luminescence from Molecular Aggregates, South China University of Technology, Guangzhou 510640, China

<sup>b</sup>School of Science and Engineering, Shenzhen Institute of Aggregate Science and Technology, The Chinese University of Hong Kong, Shenzhen, Guangdong 518172, China

<sup>c</sup>AIE Institute, Guangzhou 510530, China

**KEYWORDS:** Elemental Sulfur, Difluorocarbene, Polythiourea, Multicomponent Polymerization, Refractive Index

## Table and Contents

### Materials and Instruments

### Synthetic Procedures and Characterization Data

**Figure S1.** HRMS spectrum of the reaction solution of *p*-toluidine, sulfur, and PDFA in DMAc.

**Figure S2.** Proposed mechanism for the MCP of amine, sulfur and PDFA.

**Figure S3.** Crystal stacking and H-bond diagram of compound **4d-4i**.

**Table S1.** Effect of solvent on the polymerization

**Table S2.** Effect of base on the polymerization

**Table S3.** Effect of reaction time on the polymerization

**Table S4.** Effect of concentration of **5a** on the polymerization

**Figure S4.** FT-IR spectra of (A) *p*-toluidine, (B) model molecular **4h**, (C) diamine

monomer **5a**, and (D) **P1**.

**Figure S5.** Stack *in situ* FT-IR spectra of monomer **5a**, **P1**, PDFA, and Ph<sub>3</sub>P=S in DMSO.

**Figure S6.** The normalized GPC curves of the aromatic polythioureas.

**Figure S7.** (A) <sup>1</sup>H NMR and (B) <sup>13</sup>C NMR spectra of **5a**, model molecular **4h**, and **P1** in DMSO-*d*<sub>6</sub>.

**Figure S8.** <sup>1</sup>H NMR spectra of **P1-P5** in DMSO-*d*<sub>6</sub>.

**Figure S9.** <sup>1</sup>H NMR spectra of **P6-P10** in DMSO-*d*<sub>6</sub>.

**Figure S10.** <sup>13</sup>C NMR spectra of **P1-P5** in DMSO-*d*<sub>6</sub>.

**Figure S11.** <sup>13</sup>C NMR spectra of **P6-P10** in DMSO-*d*<sub>6</sub>.

**Figure S12.** X-ray photoelectron spectra of S 2p energy band of (A) elemental sulfur, (B) model compound **4h** and (C) polythiourea **P1**.

**Figure S13.** FT-IR spectra of **P2-P5**.

**Figure S14.** FT-IR spectra of **P6-P10**.

**Figure S15.** DSC curve of **P10**. *T*<sub>g</sub>: glass transition temperature.

**Table S5.** Refractive indices and chromatic dispersions.

**Figure S16.** Transmittance spectra of **P1**, **P2**, **P5-P7**, **P9** and **P10**. Insert pictures were dry solid and spin-coated film of **P10** on quartz.

**Table S6.** Single crystal data of compounds **4d-4f**

**Table S7.** Single crystal data of compounds **4g-4i**

**Figure S17.** <sup>1</sup>H NMR spectrum of **4a** in DMSO-*d*<sub>6</sub>.

**Figure S18.** <sup>13</sup>C NMR spectrum of **4a** in DMSO-*d*<sub>6</sub>.

**Figure S19.** HR-MS spectrum of **4a**.

**Figure S20.** <sup>1</sup>H NMR spectrum of **4b** in DMSO-*d*<sub>6</sub>.

**Figure S21.** <sup>13</sup>C NMR spectrum of **4b** in DMSO-*d*<sub>6</sub>.

**Figure S22.** <sup>1</sup>H NMR spectrum of **4c** in DMSO-*d*<sub>6</sub>.

**Figure S23.** <sup>13</sup>C NMR spectrum of **4c** in DMSO-*d*<sub>6</sub>.

**Figure S24.** HR-MS spectrum of **4c**.

**Figure S25.** <sup>1</sup>H NMR spectrum of **4d** in DMSO-*d*<sub>6</sub>.

**Figure S26.**  $^{13}\text{C}$  NMR spectrum of **4d** in  $\text{DMSO-}d_6$ .

**Figure S27.**  $^{19}\text{F}$  NMR spectrum of **4d** in  $\text{DMSO-}d_6$ .

**Figure S28.** HR-MS spectrum of **4d**.

**Figure S29.**  $^1\text{H}$  NMR spectrum of **4e** in  $\text{DMSO-}d_6$ .

**Figure S30.**  $^{13}\text{C}$  NMR spectrum of **4e** in  $\text{DMSO-}d_6$ .

**Figure S31.**  $^1\text{H}$  NMR spectrum of **4f** in  $\text{DMSO-}d_6$ .

**Figure S32.**  $^{13}\text{C}$  NMR spectrum of **4f** in  $\text{DMSO-}d_6$ .

**Figure S33.** HR-MS spectrum of **4f**.

**Figure S34.**  $^1\text{H}$  NMR spectrum of **4g** in  $\text{DMSO-}d_6$ .

**Figure S35.**  $^{13}\text{C}$  NMR spectrum of **4g** in  $\text{DMSO-}d_6$ .

**Figure S36.** HR-MS spectrum of **4g**.

**Figure S37.**  $^1\text{H}$  NMR spectrum of **4h** in  $\text{DMSO-}d_6$ .

**Figure S38.**  $^{13}\text{C}$  NMR spectrum of **4h** in  $\text{DMSO-}d_6$ .

**Figure S39.** HR-MS spectrum of **4h**.

**Figure S40.**  $^1\text{H}$  NMR spectrum of **4i** in  $\text{DMSO-}d_6$ .

**Figure S41.**  $^{13}\text{C}$  NMR spectrum of **4i** in  $\text{DMSO-}d_6$ .

**Figure S42.**  $^1\text{H}$  NMR spectrum of  $\text{Ph}_3\text{P}=\text{S}$  in  $\text{CDCl}_3$ .

**Figure S43.**  $^{13}\text{C}$  NMR spectrum of  $\text{Ph}_3\text{P}=\text{S}$  in  $\text{CDCl}_3$ .

**Figure S44.**  $^{31}\text{P}$  NMR spectrum of  $\text{Ph}_3\text{P}=\text{S}$  in  $\text{CDCl}_3$ .

**Figure S45.**  $^1\text{H}$  NMR spectrum of **P1** in  $\text{DMSO-}d_6$ .

**Figure S46.**  $^{13}\text{C}$  NMR spectrum of **P1** in  $\text{DMSO-}d_6$ .

**Figure S47.**  $^1\text{H}$  NMR spectrum of **P2** in  $\text{DMSO-}d_6$ .

**Figure S48.**  $^{13}\text{C}$  NMR spectrum of **P2** in  $\text{DMSO-}d_6$ .

**Figure S49.**  $^1\text{H}$  NMR spectrum of **P3** in  $\text{DMSO-}d_6$ .

**Figure S50.**  $^{13}\text{C}$  NMR spectrum of **P3** in  $\text{DMSO-}d_6$ .

**Figure S51.**  $^1\text{H}$  NMR spectrum of **P4** in  $\text{DMSO-}d_6$ .

**Figure S52.**  $^{13}\text{C}$  NMR spectrum of **P4** in  $\text{DMSO-}d_6$ .

**Figure S53.**  $^1\text{H}$  NMR spectrum of **P5** in  $\text{DMSO-}d_6$ .

**Figure S54.**  $^{13}\text{C}$  NMR spectrum of **P5** in  $\text{DMSO-}d_6$ .

**Figure S55.**  $^1\text{H}$  NMR spectrum of **P6** in  $\text{DMSO-}d_6$ .  
**Figure S56.**  $^{13}\text{C}$  NMR spectrum of **P6** in  $\text{DMSO-}d_6$ .  
**Figure S57.**  $^1\text{H}$  NMR spectrum of **P7** in  $\text{DMSO-}d_6$ .  
**Figure S58.**  $^{13}\text{C}$  NMR spectrum of **P7** in  $\text{DMSO-}d_6$ .  
**Figure S59.**  $^1\text{H}$  NMR spectrum of **P8** in  $\text{DMSO-}d_6$ .  
**Figure S60.**  $^{13}\text{C}$  NMR spectrum of **P8** in  $\text{DMSO-}d_6$ .  
**Figure S61.**  $^1\text{H}$  NMR spectrum of **P9** in  $\text{DMSO-}d_6$ .  
**Figure S62.**  $^{13}\text{C}$  NMR spectrum of **P9** in  $\text{DMSO-}d_6$ .  
**Figure S63.**  $^1\text{H}$  NMR spectrum of **P10** in  $\text{DMSO-}d_6$ .  
**Figure S64.**  $^{13}\text{C}$  NMR spectrum of **P10** in  $\text{DMSO-}d_6$ .

## Materials and Instruments

Sublimated sulfur was purchased from Alfa Aesar; diamines 4,4'-diaminodiphenylmethane, 4,4'-diaminodiphenyl ether, 1,4-phenylenediamine, 2,5-dimethyl-1,4-phenylenediamine, 4,4'-diaminodiphenylsulfone, 1,4-bis(aminomethyl)benzene, dimethylacetamide (DMAc), dimethyl sulfoxide (DMSO), and dimethylformamide (DMF) were purchased from Energy Chemical Ltd.; bis(4-aminophenyl) sulfide was purchased from TCI, 4,4'-(ethane-1,2-diylbis(oxy))dianiline and *p*-toluidine were purchased from Bide Pharmatech Ltd.; 4,4'-dimethylbenzophenone was purchased from Meryer (Shanghai) Biochemical Technology Ltd.; 2,2-difluoro-2-triphenylphosphoniumylacetate was purchased from Shanghai Topbiochem Ltd.; methanol and tetrahydrofuran (THF) were purchased from Shanghai Titan Scientific Co., Ltd.; chlorobenzene was purchased from Aladdin; single side polished wafer was purchased Lige. All reactants and reagents were used without further purification, unless otherwise specified.

$^1\text{H}$ ,  $^{13}\text{C}$ ,  $^{19}\text{F}$ , and  $^{31}\text{P}$  NMR spectra were estimated on a Bruker Avance 400 MHz, 500 MHz or 600 MHz NMR spectrometer using deuterated dimethyl sulfoxide (DMSO- $d_6$ ) or  $\text{CDCl}_3$  and tetramethylsilane (TMS,  $\delta = 0$ ) as internal reference. FT-IR spectra were determined on a Bruker Vector 33 FT-IR spectrometer by potassium bromide pellet technique. High resolution mass spectra measurements were carried out on a Bruker maxis impact mass spectrometer. The weight average molecular weights ( $M_w$ ) and polydispersity indices ( $\text{PDI} = M_w/M_n$ ) of the polymers were estimated by a Waters 1515 gel permeation chromatography system. DMF/LiBr solution (0.05 M LiBr) was used as eluent at a flow rate of 1 mL/min. A set of monodispersed PMMA, covering the  $M_w$  range of  $10^3$ - $10^6$  g/mol, were utilized as standards for molecular weight calibration. Thermogravimetric analysis was carried out on a Netzsch TG STA449F5 at a heating rate of 10 °C/min in a nitrogen flow. Kinetic data analysis was obtained through in situ IR technique, and the polymerization spectra were recorded on a ReactIR 15 from Mettler Toledo AutoChem.

## Synthetic Procedures and Characterization Data

### Typical procedure of the multicomponent reaction of sulfur, amines, and PDFA.

Sublimed sulfur (45 mg, 1.4 mmol), **1a** (135 mg, 1.0 mmol) and PDFA (249 mg, 0.7 mmol) were reacted directly in 1 mL DMAc under nitrogen at 60 °C for 0.5 h in a 10 mL Schlenk tube equipped with a magnetic stirrer. The solution was cooled to room temperature and 10 mL of water was added. Ethyl acetate was used to extract the solution three times (3 × 5 mL). The organic layers were combined, and the solvent was removed by vacuum rotary evaporation, and the crude product was then purified by silica gel column chromatography with petroleum ether/ethyl acetate (v/v = 4/1) to produce model compound **4a** as a white solid in 91% yield obtained based on amine. **4a**: <sup>1</sup>H NMR (400 MHz, DMSO-*d*<sub>6</sub>) δ (TMS, ppm): 10.08 (s, 2H), 8.06 (s, 2H), 7.75 (t, *J* = 7.7 Hz, 4H), 7.49 (t, *J* = 7.9 Hz, 2H), 2.57 (s, 6H). <sup>13</sup>C NMR (100 MHz, DMSO-*d*<sub>6</sub>) δ (TMS, ppm): 197.97 (C=O), 180.57 (C=S), 140.25, 137.56, 129.29, 128.96, 124.95, 123.65, 27.25. HRMS: [M+H<sup>+</sup>] Calc. 313.1005, Found 313.1009. Byproduct Ph<sub>3</sub>P=S, white solid, the yield was calculated base on PDFA. yield: 90%. <sup>1</sup>H NMR (400 MHz, CDCl<sub>3</sub>) δ (TMS, ppm): 7.75-7.69 (m, 6H), 7.54-7.49 (m, 3H), 7.47-7.42 (m, 6H). <sup>13</sup>C NMR (100 MHz, CDCl<sub>3</sub>) δ (TMS, ppm): 133.49, 132.64, 132.47, 132.36, 131.70, 131.67, 128.72, 128.59. <sup>31</sup>P NMR (202 MHz, CDCl<sub>3</sub>): δ 43.33. HRMS (ESI): [M+Na<sup>+</sup>] Calc. 317.0524, Found 317.0536.

**4b**: white solid, yield 84%. <sup>1</sup>H NMR (500 MHz, DMSO-*d*<sub>6</sub>) δ (TMS, ppm): 10.45 (s, 2H), 7.76 (m, 8H), 7.74-7.72 (m, 4H), 7.69-7.66 (m, 2H), 7.58-7.55 (m, 4H). <sup>13</sup>C NMR (125 MHz, CDCl<sub>3</sub>) δ (TMS, ppm): 199.83 (C=O), 184.33 (C=S), 148.85, 142.63, 137.61, 137.43, 135.85, 134.63, 133.76, 127.07.

**4c**: white solid, yield 89%. <sup>1</sup>H NMR (400 MHz, DMSO-*d*<sub>6</sub>) δ (TMS, ppm): 10.35 (s, 2H), 7.92 (d, *J* = 8.5 Hz, 4H), 7.70 (d, *J* = 8.4 Hz, 4H), 4.32-4.27 (m, 4H), 1.31 (t, *J* = 7.1 Hz, 6H). <sup>13</sup>C NMR (100 MHz, DMSO-*d*<sub>6</sub>) δ (TMS, ppm): 179.15 (C=S), 165.30 (C=O), 143.82, 129.76, 125.10, 122.05, 60.51, 14.20. HRMS: [M+H<sup>+</sup>] Calc. 373.1217, Found 373.1219.

**4d:** white solid, yield 78%. <sup>1</sup>H NMR (400 MHz, DMSO-*d*<sub>6</sub>)  $\delta$  (TMS, ppm): 10.37 (s, 2H), 7.76 (d, *J* = 8.5 Hz, 4H), 7.70 (d, *J* = 8.6 Hz, 4H). <sup>13</sup>C NMR (100 MHz, DMSO-*d*<sub>6</sub>)  $\delta$  (TMS, ppm): 179.69 (C=S), 143.07, 125.69, 124.43, 124.11, 123.02. <sup>19</sup>F NMR (376 MHz, DMSO-*d*<sub>6</sub>)  $\delta$  (TMS, ppm): -60.48. HRMS: [M+H<sup>+</sup>] Calc. 365.0542, Found 365.0545.

**4e:** white solid, yield 64%. <sup>1</sup>H NMR (400 MHz, DMSO-*d*<sub>6</sub>)  $\delta$  (TMS, ppm): 10.24 (s, 2H), 7.99 (s, 2H), 7.78-7.76 (m, 2H), 7.62-7.56 (m, 4H). <sup>13</sup>C NMR (100 MHz, DMSO-*d*<sub>6</sub>)  $\delta$  (TMS, ppm): 190.35, 180.15, 140.13, 129.90, 128.69, 126.94, 118.56, 111.23.

**4f:** light yellow solid, yield 90%. <sup>1</sup>H NMR (600 MHz, DMSO-*d*<sub>6</sub>)  $\delta$  (TMS, ppm): 9.67 (s, 2H), 8.22 (d, *J* = 9.1 Hz, 4H), 7.72 (d, *J* = 8.8 Hz, 4H). <sup>13</sup>C NMR (150 MHz, DMSO-*d*<sub>6</sub>)  $\delta$  (TMS, ppm): 151.63 (C=S), 145.68, 141.53, 125.14, 117.98. HRMS: [M+H<sup>+</sup>] Calc. 319.3150, Found 319.3034.

**4g:** white solid, yield 85%. <sup>1</sup>H NMR (400 MHz, DMSO-*d*<sub>6</sub>)  $\delta$  (TMS, ppm): 10.51 (s, 2H), 7.89 (d, *J* = 8.4 Hz, 4H), 7.80 (d, *J* = 8.5 Hz, 4H), 3.20 (s, 6H). <sup>13</sup>C NMR (100 MHz, DMSO-*d*<sub>6</sub>)  $\delta$  (TMS, ppm): 179.53 (C=S), 144.00, 135.68, 127.74, 122.63, 43.72. HRMS [M+Na<sup>+</sup>] Calc. 407.0164, Found 407.0165.

**4h:** white solid, yield 93%. <sup>1</sup>H NMR (500 MHz, DMSO-*d*<sub>6</sub>)  $\delta$  (TMS, ppm): 9.58 (s, 2H), 7.33 (d, *J* = 8.3 Hz, 4H), 7.13 (d, *J* = 8.1 Hz, 4H), 2.27 (s, 6H, CH<sub>3</sub>). <sup>13</sup>C NMR (125 MHz, DMSO-*d*<sub>6</sub>)  $\delta$  (TMS, ppm): 179.63 (C=S), 136.86, 133.60, 128.87, 123.90, 20.52. HRMS: [M+Na<sup>+</sup>] Calc. 279.0932, Found 279.0923.

**4i:** white solid, yield 62%. <sup>1</sup>H NMR (500 MHz, DMSO-*d*<sub>6</sub>)  $\delta$  (TMS, ppm): 7.85 (s, 2H), 7.15-7.11 (m, 8H), 4.61 (s, 4H), 2.27 (s, 6H). <sup>13</sup>C NMR (125 MHz, DMSO-*d*<sub>6</sub>)  $\delta$  (TMS, ppm): 135.89, 128.79, 127.24, 46.91, 20.68.

### **Typical procedure of the multicomponent polymerizations of sulfur, diamines, and PDFAs.**

Diamine **5a** (0.5 mmol, 99 mg), sublimed sulfur (1.3 mmol, 42 mg), PDFAs (0.65 mmol, 232 mg) were reacted in 1 mL DMAc under nitrogen at 60 °C for 1 h in a 10 mL

Schlenk tube equipped with a magnetic stir bar. The reaction solution was cooled to room temperature and was diluted with 4 mL DMAc, and then dropwise added 100 mL methanol through a cotton filter for precipitation. The precipitates were filtrated and washed with methanol ( $3 \times 50$  mL), and then the precipitates were dried under vacuum to obtain absolute weight and a white solid **P1** was obtained in 93% yield.  $M_w = 65900$  g/mol  $M_w/M_n = 1.85$ . FT-IR (KBr disk)  $\nu$  ( $\text{cm}^{-1}$ ): 3355, 3222, 1595, 1537, 1509, 1412, 1315, 1254, 1017, 926, 814, 715, 500.  $^1\text{H}$  NMR (500 MHz, DMSO- $d_6$ )  $\delta$  (TMS, ppm): 9.67 (s, 2H), 7.36 (d,  $J = 9.0$  Hz, 4H), 7.18 (d,  $J = 9.2$  Hz, 4H), 3.86 (s, 2H).  $^{13}\text{C}$  NMR (125 MHz, DMSO- $d_6$ )  $\delta$  (TMS, ppm): 179.49, 137.49, 137.41, 128.61, 123.84, 40.10.

### Characterization of polythioureas P2-P10

**P2**: a white solid was obtained in 89% yield.  $M_w = 33500$  g/mol,  $M_w/M_n = 1.50$ . FT-IR (KBr disk),  $\nu$  ( $\text{cm}^{-1}$ ): 3233, 1600, 1539, 1495, 1337, 1212, 1161, 1011, 876, 830, 505.  $^1\text{H}$  NMR (500 MHz, DMSO- $d_6$ )  $\delta$  (TMS, ppm): 8.86 (s, 2H), 6.61 (d,  $J = 8.6$  Hz, 4H), 6.15 (d,  $J = 8.5$  Hz, 4H).  $^{13}\text{C}$  NMR (125 MHz, DMSO- $d_6$ )  $\delta$  (TMS, ppm): 179.98, 153.62, 134.83, 125.98, 118.46.

**P3**: a light-yellow solid was obtained in 89% yield.  $M_w = 29100$  g/mol,  $M_w/M_n = 1.82$ . FT-IR (KBr disk),  $\nu$  ( $\text{cm}^{-1}$ ): 3352, 2078, 1641, 1583, 1400, 1397, 1309, 1246, 1177, 1081, 1012, 922, 821, 766, 567, 498.  $^1\text{H}$  NMR (400 MHz, DMSO- $d_6$ )  $\delta$  (TMS, ppm): 9.95 (s, 2H), 7.50 (d,  $J = 8.3$  Hz, 4H), 7.29 (d,  $J = 8.1$  Hz, 4H).  $^{13}\text{C}$  NMR (100 MHz, DMSO- $d_6$ )  $\delta$  (TMS, ppm): 179.28, 138.83, 131.06, 130.12, 124.26.

**P4**: a white solid was obtained in 99% yield.  $M_w = 46800$  g/mol,  $M_w/M_n = 1.93$ . FT-IR (KBr disk),  $\nu$  ( $\text{cm}^{-1}$ ): 3208, 1690, 1550, 1506, 1337, 1295, 1218, 1167, 1046, 923, 827, 722, 677, 518.  $^1\text{H}$  NMR (400 MHz, DMSO- $d_6$ )  $\delta$  (TMS, ppm): 9.45 (s, 2H), 7.33 (d,  $J = 8.3$  Hz, 4H), 6.95 (d,  $J = 8.6$  Hz, 4H), 4.29 (s, 4H).  $^{13}\text{C}$  NMR (100 MHz, DMSO- $d_6$ )  $\delta$  (TMS, ppm): 180.14, 155.55, 132.49, 126.06, 114.30, 66.53.

**P5**: a white solid was obtained in 98% yield.  $M_w = 36900$  g/mol,  $M_w/M_n = 2.06$ . FT-IR (KBr disk),  $\nu$  ( $\text{cm}^{-1}$ ): 3214, 2034, 1600, 1505, 1408, 1307, 1246, 1014, 932, 830, 681,



504.  $^1\text{H}$  NMR (500 MHz,  $\text{DMSO-}d_6$ )  $\delta$  (TMS, ppm): 9.78 (s, 2H), 7.45 (s, 4H).  $^{13}\text{C}$  NMR (125 MHz,  $\text{DMSO-}d_6$ )  $\delta$  (TMS, ppm): 179.43, 135.85, 123.74.

**P6:** a white solid was obtained in 78% yield.  $M_w = 32500$  g/mol,  $M_w/M_n = 1.55$ . FT-IR (KBr disk),  $\nu$  ( $\text{cm}^{-1}$ ): 3180, 2918, 2076, 1623, 1509, 1459, 1344, 1226, 1306, 884, 702.  $^1\text{H}$  NMR (500 MHz,  $\text{DMSO-}d_6$ )  $\delta$  (TMS, ppm): 9.03 (s, 2H), 7.14 (s, 2H), 2.17 (s, 6H).  $^{13}\text{C}$  NMR (100 MHz,  $\text{DMSO-}d_6$ )  $\delta$  (TMS, ppm): 180.96, 135.82, 132.71, 129.88, 17.35.

**P7:** a yellow solid was obtained in 43% yield.  $M_w = 10400$  g/mol,  $M_w/M_n = 1.66$ . FT-IR (KBr disk),  $\nu$  ( $\text{cm}^{-1}$ ): 3270, 3055, 1542, 1508, 1420, 1380, 1337, 1288, 1174, 1109, 1019, 958, 753.  $^1\text{H}$  NMR (400 MHz,  $\text{DMSO-}d_6$ )  $\delta$  (TMS, ppm): 7.91 (s, 2H), 7.23 (s, 4H), 4.64 (s, 4H).  $^{13}\text{C}$  NMR (100 MHz,  $\text{DMSO-}d_6$ )  $\delta$  (TMS, ppm): 137.84, 127.23, 46.81.

**P8:** a white solid was obtained in 70% yield.  $M_w = 5700$  g/mol,  $M_w/M_n = 1.15$ . FT-IR (KBr disk),  $\nu$  ( $\text{cm}^{-1}$ ): 3266, 3061, 1696, 1548, 1419, 1375, 1337, 1287, 1015, 956, 734.  $^1\text{H}$  NMR (400 MHz,  $\text{DMSO-}d_6$ )  $\delta$  (TMS, ppm): 7.95 (s, 2H), 7.39-7.18 (m, 4H), 4.67 (s, 4H).  $^{13}\text{C}$  NMR (100 MHz,  $\text{DMSO-}d_6$ )  $\delta$  (TMS, ppm): 177.32, 139.25, 128.30, 126.23, 125.77, 47.00.

**P9:** a white solid was obtained in 76% yield.  $M_w = 7900$  g/mol,  $M_w/M_n = 1.29$ . FT-IR (KBr disk),  $\nu$  ( $\text{cm}^{-1}$ ): 3568, 3365, 1637, 1591, 1530, 1495, 1315, 1147, 1104, 736, 681, 551.  $^1\text{H}$  NMR (400 MHz,  $\text{DMSO-}d_6$ )  $\delta$  (TMS, ppm): 10.49 (s, 2H), 7.90 (d,  $J = 8.3$  Hz, 4H), 7.74 (d,  $J = 8.5$  Hz, 4H).  $^{13}\text{C}$  NMR (100 MHz,  $\text{DMSO-}d_6$ )  $\delta$  (TMS, ppm): 179.39, 143.97, 136.13, 128.10, 122.84.

**P10:** a white solid was obtained in 85% yield,  $M_w = 18600$  g/mol,  $M_w/M_n = 1.66$ . FT-IR (KBr disk),  $\nu$  ( $\text{cm}^{-1}$ ) 3266.57, 1644.32, 1598.02, 1521.24, 1404.94, 1310.09, 1284.12, 1246.86, 1172.33, 1147.19, 1017.64, 927.31, 855.05.  $^1\text{H}$  NMR (500 MHz,  $\text{DMSO-}d_6$ )  $\delta$  (TMS, ppm): 10.44 (s, 2H), 7.77 (s, 8H).  $^{13}\text{C}$  NMR (125 MHz,  $\text{DMSO-}d_6$ )  $\delta$  (TMS, ppm): 193.31, 178.98, 143.25, 132.49, 130.32, 121.78.

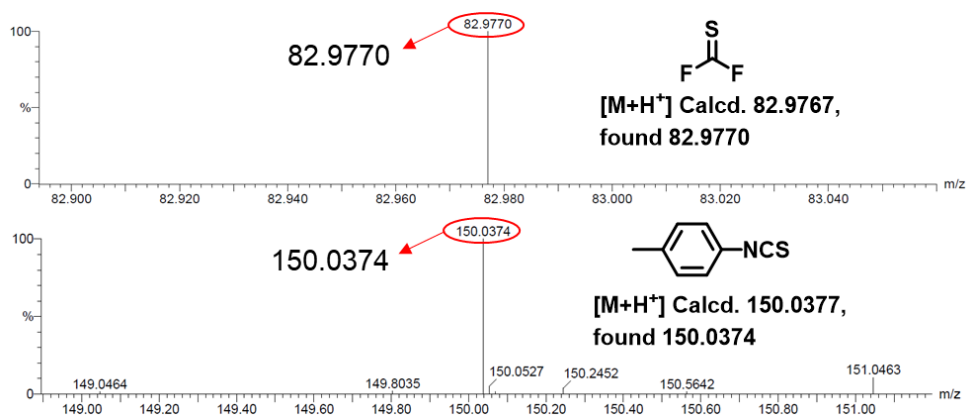

**Figure S1.** HRMS spectrum of the reaction solution of *p*-toluidine, sulfur, and PDFA in DMAc. The mixture of *p*-toluidine (1.0 mmol), elemental sulfur (1.3 mmol, 1/8 S<sub>8</sub>), and PDFA (0.65 mmol) dissolved in DMAc (1 mL) was stirred at 60 °C for 20 min under nitrogen atmosphere, which was cooled in an ice bath, and the mixture was filtered through a 200 μm filter for high-resolution mass spectrometry (HRMS) analysis.

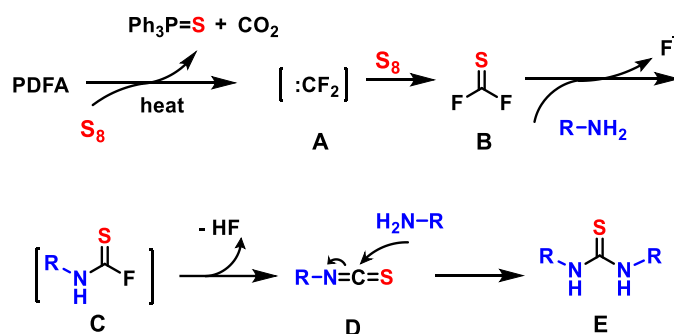

**Figure S2.** Proposed mechanism for the MCR of amine, sulfur and PDFA.

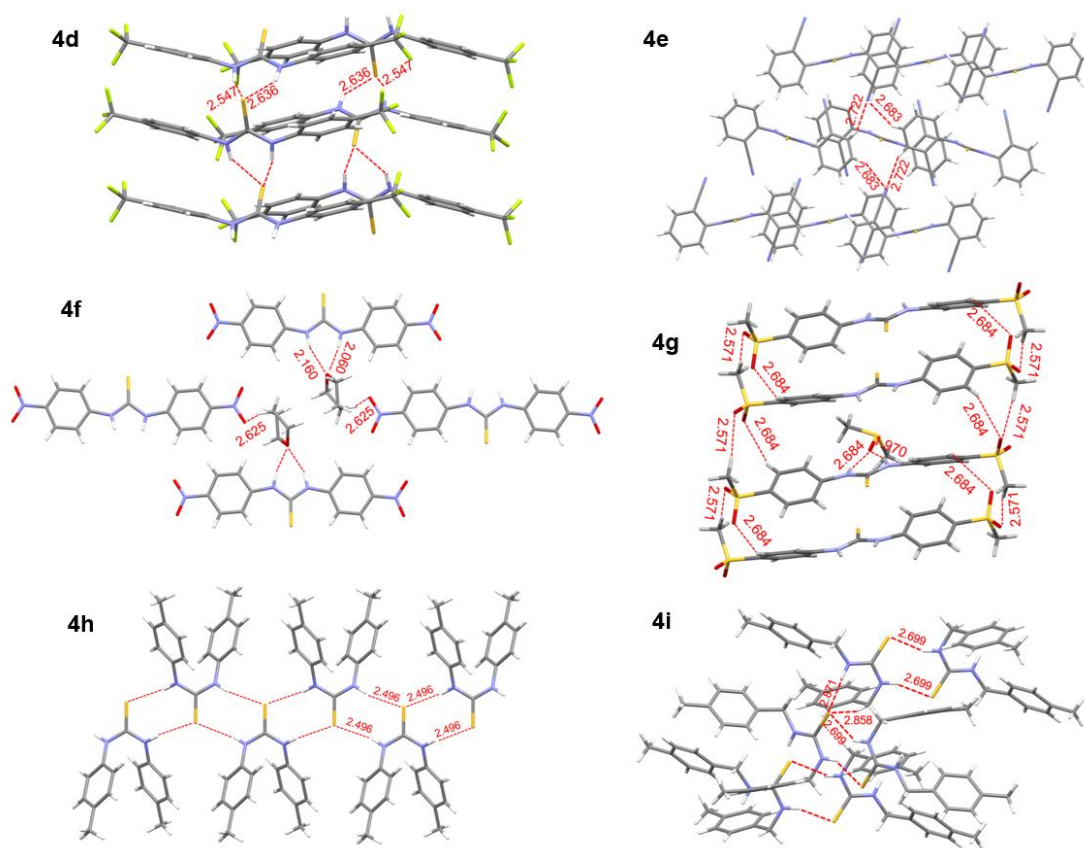

**Figure S3.** Crystal stacking and H-bond diagram of compounds **4d-4i**.

**Table S1.** Effect of solvent on the polymerization<sup>a</sup>

| entry | solvent | yield (%) | $M_w$ (g/mol) | $M_w/M_n$ |
|-------|---------|-----------|---------------|-----------|
| 1     | DMF     | 60        | 10200         | 1.24      |
| 2     | DMAc    | 84        | 16800         | 1.34      |
| 3     | DMSO    | 56        | 18700         | 1.53      |
| 4     | THF     | 60        | 10000         | 1.26      |

<sup>a</sup>**5a** (0.5 mmol),  $\text{Ph}_3\text{P}^+\text{CF}_2\text{CO}_2^-$  (0.65 mmol),  $1/8\text{S}_8$  (1.3 mmol) in 1 mL solvent and the mixture was stirred for 3 h at 40 °C under  $\text{N}_2$ .

**Table S2.** Effect of base on the polymerization<sup>a</sup>

| entry | base                            | yield (%) | $M_w$ (g/mol) | $M_w/M_n$ |
|-------|---------------------------------|-----------|---------------|-----------|
| 1     | K <sub>2</sub> CO <sub>3</sub>  | 91        | 38500         | 1.29      |
| 2     | Na <sub>2</sub> CO <sub>3</sub> | 98        | 33400         | 1.38      |
| 3     | NaOH                            | 89        | 25600         | 1.35      |
| 4     | KF                              | 79        | 14400         | 1.24      |
| 5     | TEA                             | 96        | 29300         | 1.36      |
| 6     | -                               | 94        | 53900         | 1.82      |

<sup>a</sup>**5a** (0.5 mmol), Ph<sub>3</sub>P<sup>+</sup>CF<sub>2</sub>CO<sub>2</sub><sup>-</sup> (0.65 mmol), 1/8S<sub>8</sub> (1.3 mmol) in 1 mL DMAc and the mixture was stirred for 3 h at 60 °C, under N<sub>2</sub>.

**Table S3.** Effect of reaction time on the polymerization<sup>a</sup>

| entry | <i>t</i> | yield (%) | $M_w$ (g/mol) | $M_w/M_n$ |
|-------|----------|-----------|---------------|-----------|
| 1     | 10 min   | 87        | 42000         | 1.70      |
| 2     | 0.5 h    | 93        | 53200         | 1.70      |
| 3     | 1.0 h    | 93        | 65900         | 1.85      |
| 4     | 2.0 h    | 94        | 54100         | 1.71      |
| 5     | 3.0 h    | 94        | 53900         | 1.82      |
| 6     | 4.0 h    | 95        | 48100         | 1.67      |

<sup>a</sup>**5a** (0.5 mmol) as standard, Ph<sub>3</sub>P<sup>+</sup>CF<sub>2</sub>CO<sub>2</sub><sup>-</sup> (0.65 mmol), 1/8S<sub>8</sub> (1.3 mmol) in 1 mL DMAc and the mixture was stirred at 60 °C under N<sub>2</sub>.

**Table S4.** Effect of concentration of **5a** on the polymerization<sup>a</sup>

| entry | [ <b>5a</b> ]/M | yield (%) | $M_w$ (g/mol) | $M_w/M_n$ |
|-------|-----------------|-----------|---------------|-----------|
| 1     | 0.25            | 93        | 25600         | 1.51      |
| 2     | 0.5             | 93        | 65900         | 1.85      |
| 3     | 1.0             | 80        | 17000         | 1.36      |

<sup>a</sup>**5a** (0.5 mmol) as standard, Ph<sub>3</sub>P<sup>+</sup>CF<sub>2</sub>CO<sub>2</sub><sup>-</sup> (0.65 mmol), 1/8S<sub>8</sub> (1.3 mmol) in 2 mL, 1 mL, and 0.5 mL of DMAc and the mixture was stirred at 60 °C for 1 h under N<sub>2</sub>.

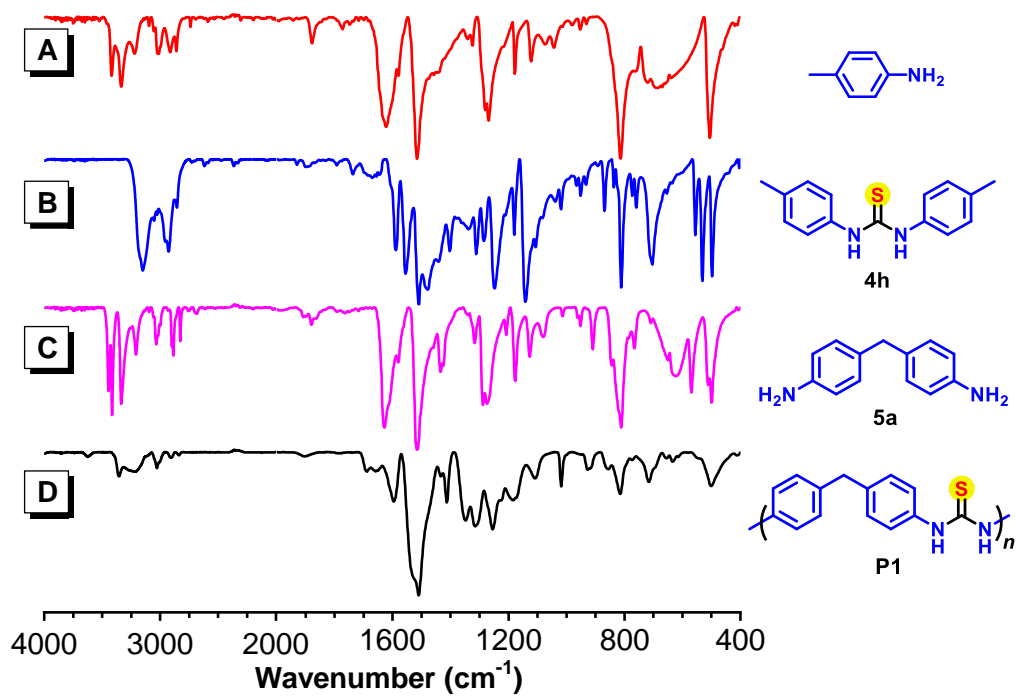

**Figure S4.** FT-IR spectra of (A) *p*-toluidine, (B) model molecular **4h**, (C) diamine monomer **5a**, and (D) **P1**.

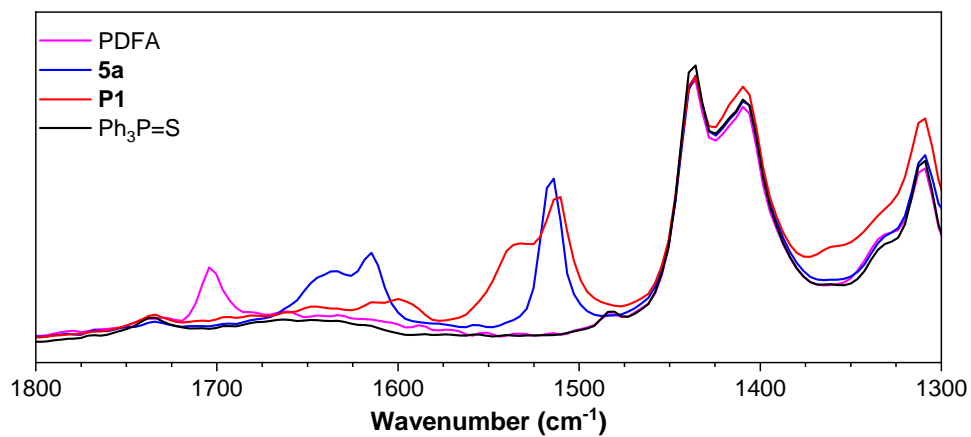

**Figure S5.** Stack *in situ* FT-IR spectra of monomer **5a**, **P1**, PDFA, and  $\text{Ph}_3\text{P}=\text{S}$  in DMSO.

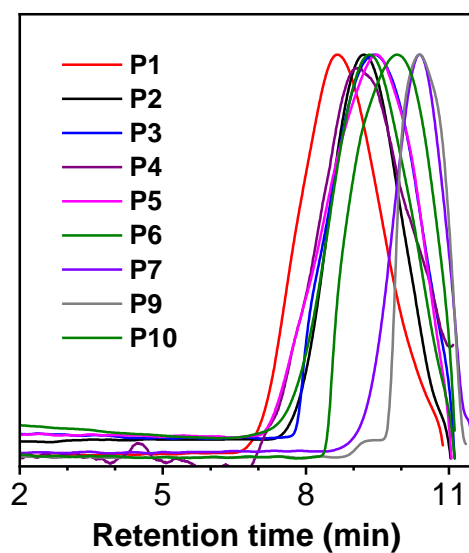

**Figure S6.** The normalized GPC curves of the aromatic polythioureas.

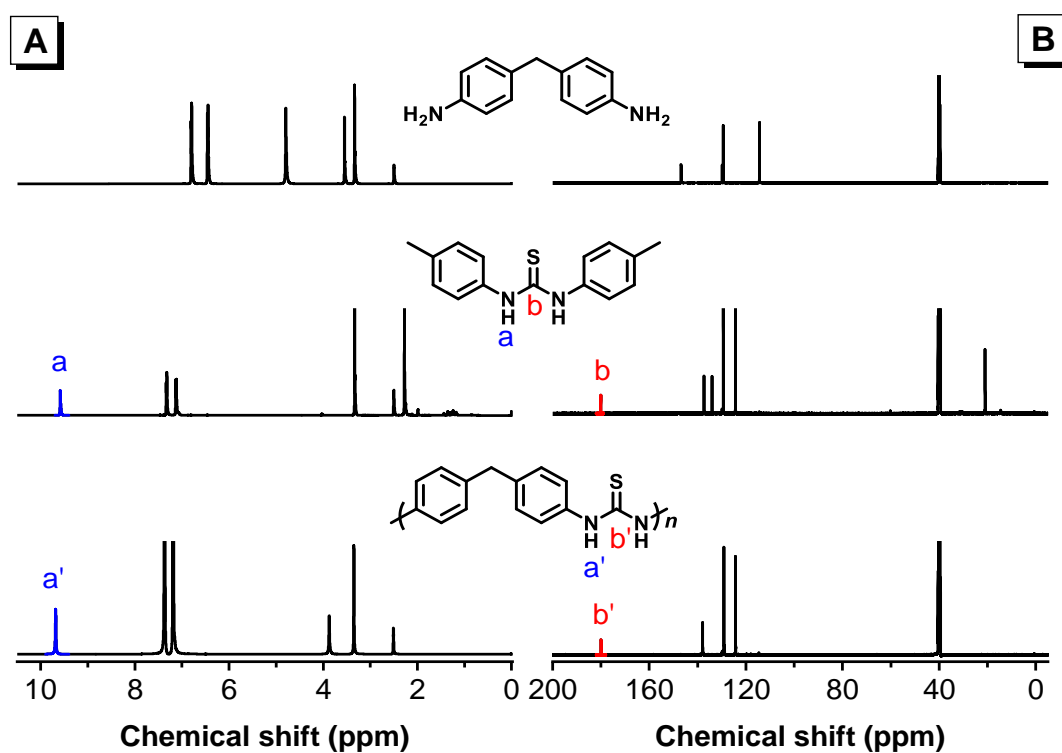

**Figure S7.** (A)  $^1\text{H}$  NMR and (B)  $^{13}\text{C}$  NMR spectra of **5a**, model molecular **4h**, and **P1** in  $\text{DMSO-}d_6$ .

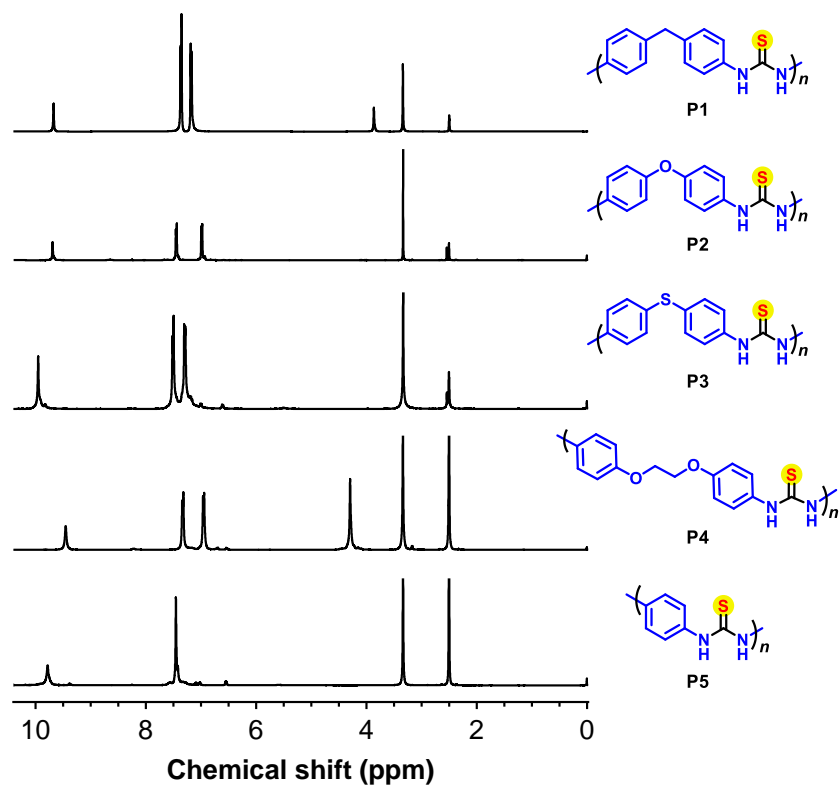

**Figure S8.**  $^1\text{H}$  NMR spectra of **P1-P5** in  $\text{DMSO-}d_6$ .

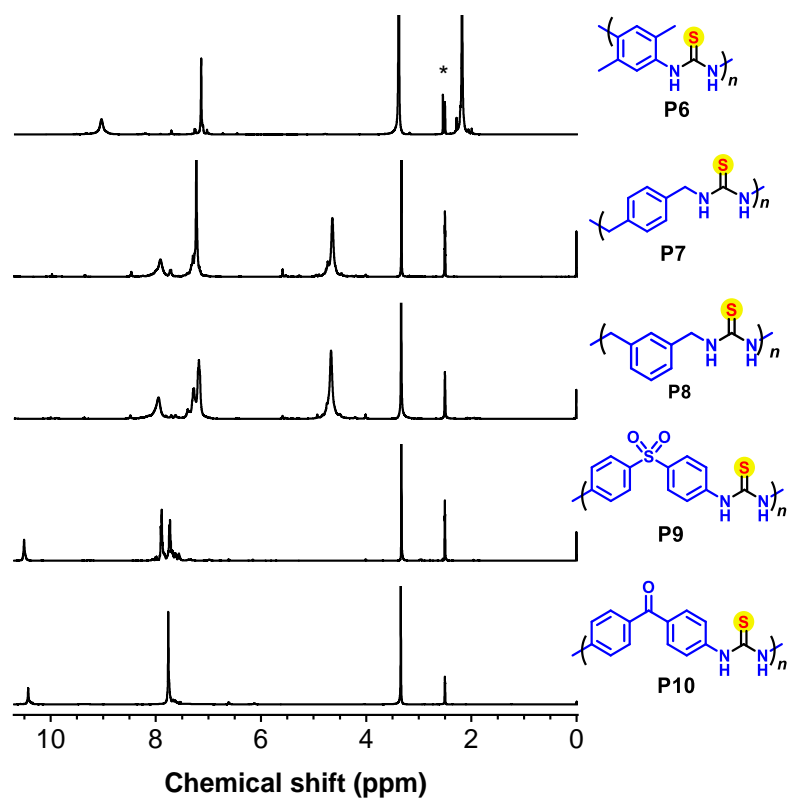

**Figure S9.**  $^1\text{H}$  NMR spectra of **P6-P10** in  $\text{DMSO-}d_6$ .

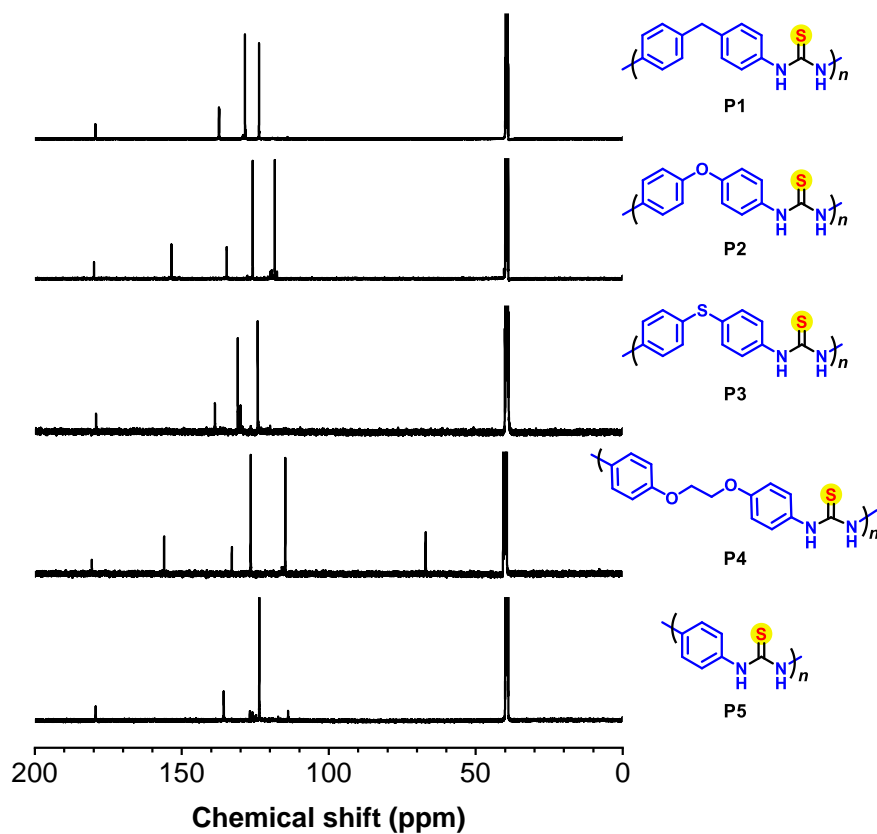

Figure S10.  $^{13}\text{C}$  NMR spectra of P1-P5 in  $\text{DMSO-}d_6$ .

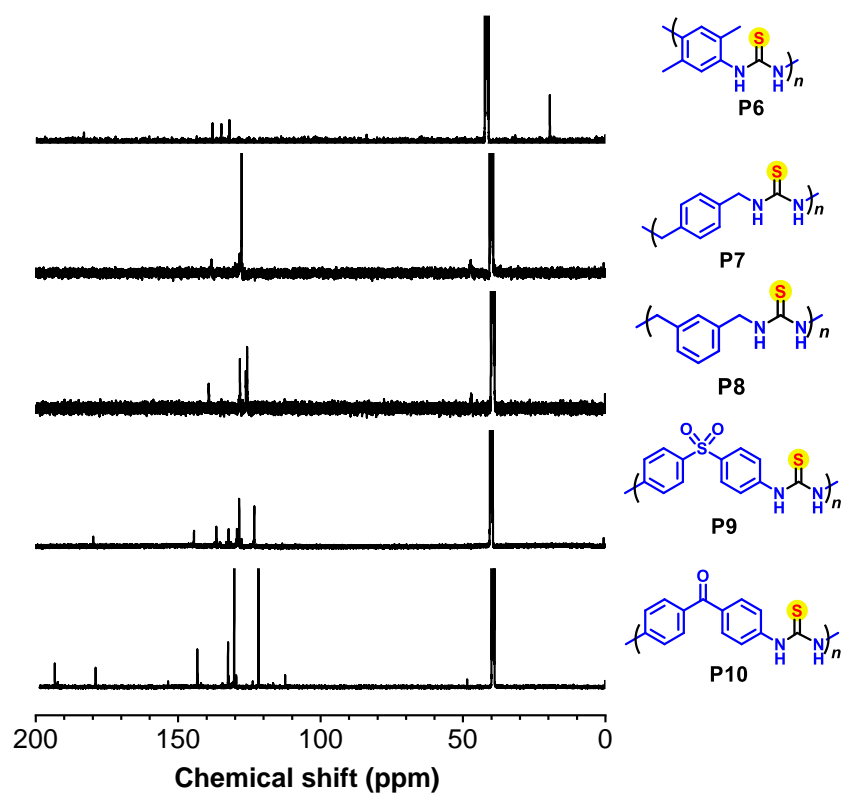

Figure S11.  $^{13}\text{C}$  NMR spectra of P6-P10 in  $\text{DMSO-}d_6$ .



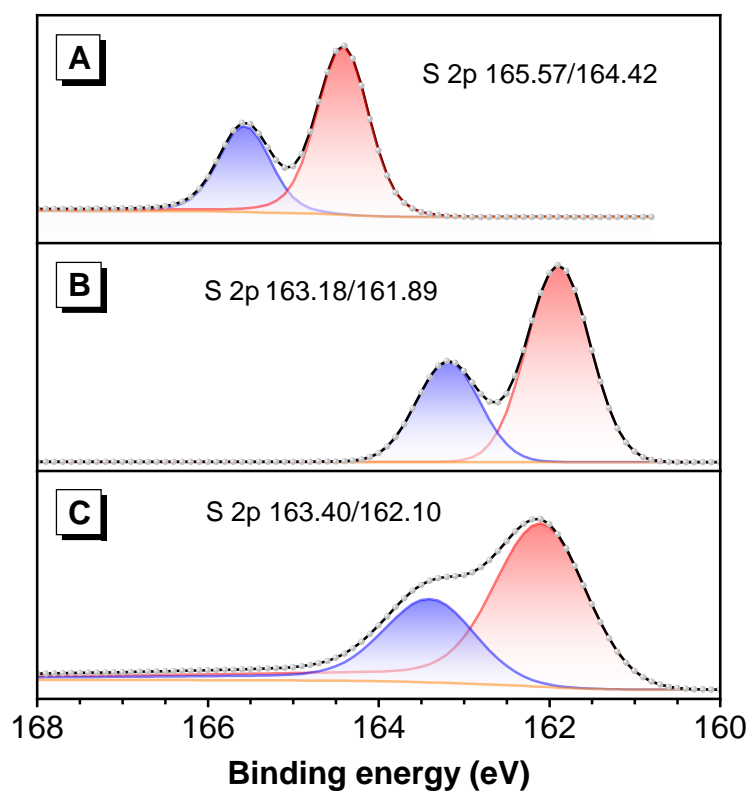

**Figure S12.** X-ray photoelectron spectra of S 2p energy band of (A) elemental sulfur, (B) model compound **4h** and (C) polythiourea **P1**.

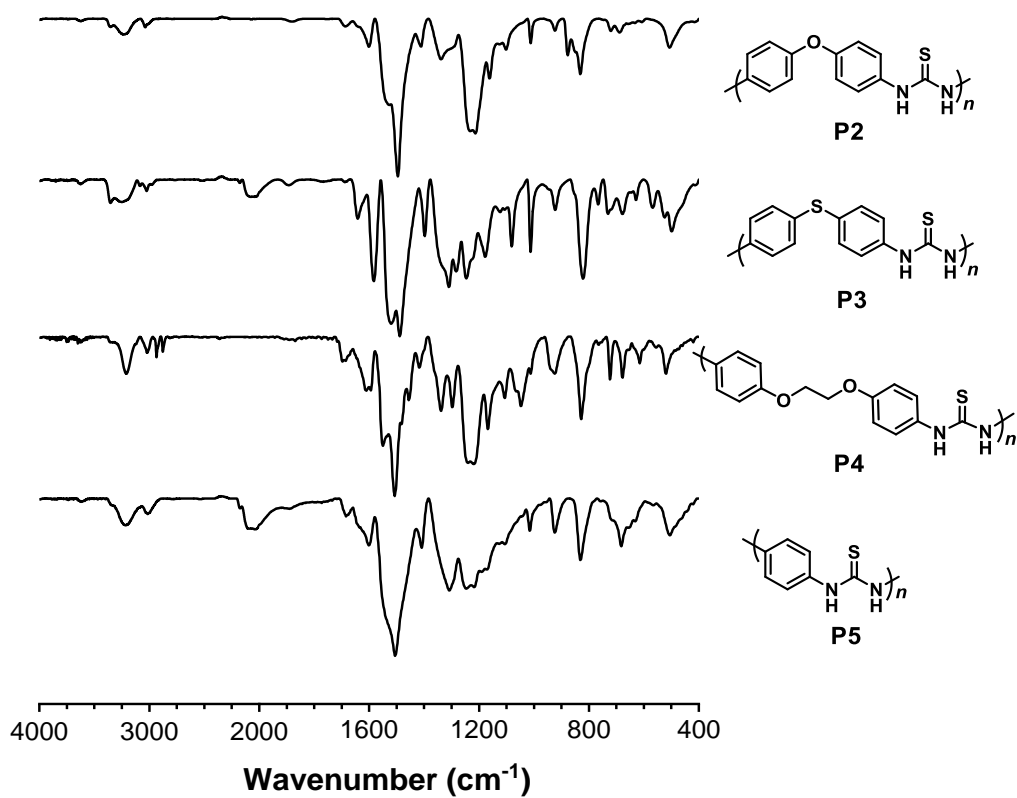

**Figure S13.** FT-IR spectra of **P2-P5**.

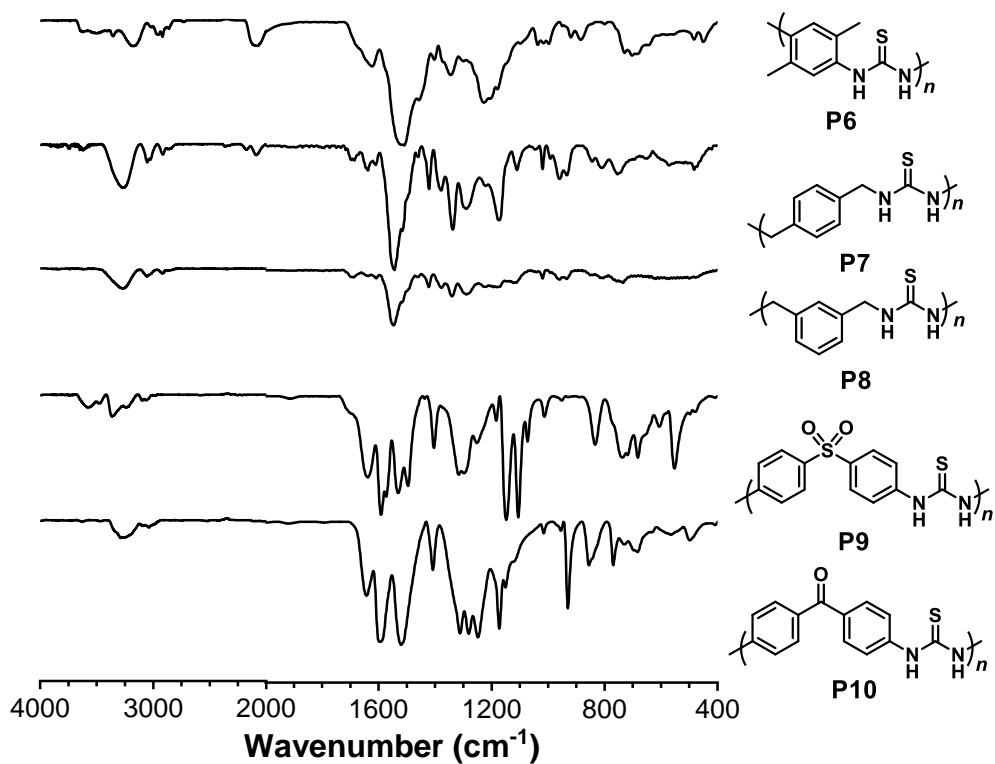

**Figure S14.** FT-IR spectra of P6-P10.

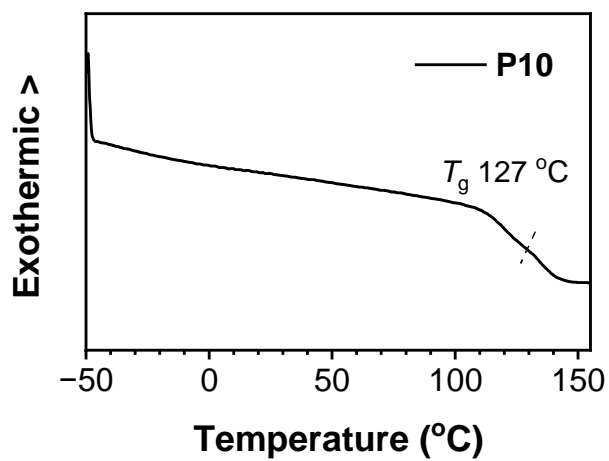

**Figure S15.** DSC curve of P10.  $T_g$ : glass transition temperature.

**Table S5.** Refractive indices and chromatic dispersions

| entry      | thickness (nm) | $n_{633}$ | $\nu_D$ | $D$    | $\nu_{D'}$ | $D'$   |
|------------|----------------|-----------|---------|--------|------------|--------|
| <b>P1</b>  | 118            | 1.7196    | 15.99   | 0.0626 | 46.78      | 0.0214 |
| <b>P2</b>  | 143            | 1.7430    | 17.10   | 0.0585 | 7.50       | 0.1333 |
| <b>P3</b>  | 149            | 1.7918    | 8.04    | 0.1245 | 46.62      | 0.0215 |
| <b>P6</b>  | 36             | 1.7588    | 13.65   | 0.0732 | 246.13     | 0.0041 |
| <b>P7</b>  | 90             | 1.6628    | 12.64   | 0.0791 | 34.68      | 0.0288 |
| <b>P9</b>  | 164            | 1.7337    | 11.84   | 0.0844 | 7.51       | 0.1332 |
| <b>P10</b> | 125            | 1.8133    | 6.71    | 0.1489 | 46.33      | 0.0216 |

<sup>a</sup>Abbreviation:  $n$  = refractive index,  $\nu_D$  = Abbé number =  $(n_D - 1)/(n_F - n_C)$ , where  $n_D$ ,  $n_F$ , and  $n_C$  are the RI values at wavelengths of Fraunhofer D, F, and C spectral lines of 589.2, 486.1, and 656.3 nm, respectively;  $\nu_{D'}$  = modified Abbé number =  $(n_{1319} - 1)/(n_{1064} - n_{1550})$ , where  $n_{1319}$ ,  $n_{1064}$ , and  $n_{1550}$  are the  $n$  values at the wavelengths of 1064, 1319, and 1550 nm,  $D = 1/\nu_D$ ,  $D' = 1/\nu_{D'}$ .

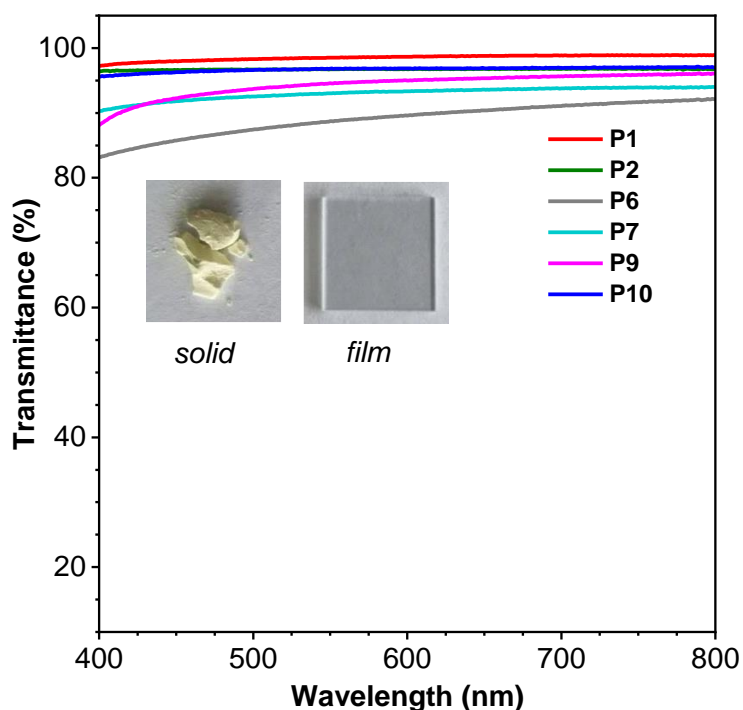**Figure S16.** Transmittance spectra of **P1**, **P2**, **P5-P7**, **P9** and **P10**. Insert pictures were dry solid and spin-coated film of **P10** on quartz.

**Table S6.** Single crystal data of compounds **4d-4f**

|                                                   | <b>4d</b>                                                              | <b>4e</b>                                                              | <b>4f</b>                                                              |
|---------------------------------------------------|------------------------------------------------------------------------|------------------------------------------------------------------------|------------------------------------------------------------------------|
| CCDC number                                       | 2407294                                                                | 2407295                                                                | 2407296                                                                |
| Empirical formula                                 | C <sub>15</sub> H <sub>10</sub> F <sub>6</sub> N <sub>2</sub> S        | C <sub>15</sub> H <sub>10</sub> N <sub>4</sub> S                       | C <sub>17</sub> H <sub>18</sub> N <sub>4</sub> O <sub>5</sub> S        |
| Formula weight                                    | 364.31                                                                 | 278.33                                                                 | 390.41                                                                 |
| Temperature [K]                                   | 302.36(10)                                                             | 300.55(10)                                                             | 149.99(10)                                                             |
| Crystal system                                    | monoclinic                                                             | orthorhombic                                                           | triclinic                                                              |
| Space group (number)                              | <i>P</i> 2 <sub>1</sub> / <i>c</i> (14)                                | <i>F</i> dd2 (43)                                                      | P – 1 (2)                                                              |
| <i>a</i> [Å]                                      | 14.2700(3)                                                             | 24.3010(9)                                                             | 6.9039(2)                                                              |
| <i>b</i> [Å]                                      | 7.5957(2)                                                              | 13.2694(4)                                                             | 10.6650(3)                                                             |
| <i>c</i> [Å]                                      | 14.4949(3)                                                             | 8.6371(3)                                                              | 12.8313(6)                                                             |
| $\alpha/\beta/\gamma$ [°]                         | 90/102.715(2)/90                                                       | 90/90/90                                                               | 69.245(4)/89.785(3)<br>)83.280(2)                                      |
| Volume [Å <sup>3</sup> ]                          | 1532.58(6)                                                             | 2785.12(16)                                                            | 876.67(6)                                                              |
| <i>Z</i>                                          | 4                                                                      | 8                                                                      | 2                                                                      |
| $\rho_{\text{calc}}$ [gcm <sup>-3</sup> ]         | 1.579                                                                  | 1.328                                                                  | 1.479                                                                  |
| $\mu$ [mm <sup>-1</sup> ]                         | 2.521                                                                  | 2.016                                                                  | 1.990                                                                  |
| <i>F</i> (000)                                    | 736                                                                    | 1152                                                                   | 408                                                                    |
| Crystal size [mm <sup>3</sup> ]                   | 0.1×0.11×0.12                                                          | 0.1×0.11×0.12                                                          | 0.02×0.01×0.01                                                         |
| Crystal colour                                    | colourless                                                             | colourless                                                             | yellow                                                                 |
| Crystal shape                                     | cube                                                                   | plate                                                                  | block                                                                  |
| Radiation                                         | Cu <i>K</i> <sub>α</sub><br>( $\lambda=1.54184$ Å)                     | Cu <i>K</i> <sub>α</sub><br>( $\lambda=1.54184$ Å)                     | Cu <i>K</i> <sub>α</sub><br>( $\lambda=1.54184$ Å)                     |
| 2 $\theta$ range [°]                              | 6.35 to 147.17<br>(0.80 Å)                                             | 12.76 to 146.97<br>(0.80 Å)                                            | 7.37 to 148.50<br>(0.80 Å)                                             |
| Index ranges                                      | -17 ≤ <i>h</i> ≤ 17<br>-5 ≤ <i>k</i> ≤ 8<br>-17 ≤ <i>l</i> ≤ 17        | -20 ≤ <i>h</i> ≤ 29<br>-16 ≤ <i>k</i> ≤ 16<br>-10 ≤ <i>l</i> ≤ 10      | -5 ≤ <i>h</i> ≤ 8<br>-13 ≤ <i>k</i> ≤ 13<br>-15 ≤ <i>l</i> ≤ 15        |
| Reflections collected                             | 9056<br>2973                                                           | 2627<br>1188                                                           | 7774<br>3349                                                           |
| Independent reflections                           | <i>R</i> <sub>int</sub> = 0.0203<br><i>R</i> <sub>sigma</sub> = 0.0193 | <i>R</i> <sub>int</sub> = 0.0125<br><i>R</i> <sub>sigma</sub> = 0.0126 | <i>R</i> <sub>int</sub> = 0.0186<br><i>R</i> <sub>sigma</sub> = 0.0217 |
| Completeness to<br>$\theta = 67.684^\circ$        | 99.1                                                                   | 99.0                                                                   | 98.0 %                                                                 |
| Data / Restraints /<br>Parameters                 | 2973 / 0 / 219                                                         | 1188 / 2 / 93                                                          | 3349/1/244                                                             |
| Goodness-of-fit on <i>F</i> <sup>2</sup>          | 1.089                                                                  | 1.082                                                                  | 1.077                                                                  |
| Final <i>R</i> indexes<br>[ $I \geq 2\sigma(I)$ ] | <i>R</i> <sub>1</sub> = 0.0602<br><i>wR</i> <sub>2</sub> = 0.1760      | <i>R</i> <sub>1</sub> = 0.0644<br><i>wR</i> <sub>2</sub> = 0.1885      | <i>R</i> <sub>1</sub> = 0.0364<br><i>wR</i> <sub>2</sub> = 0.1016      |
| Final <i>R</i> indexes<br>[all data]              | <i>R</i> <sub>1</sub> = 0.0638<br><i>wR</i> <sub>2</sub> = 0.1795      | <i>R</i> <sub>1</sub> = 0.0651<br><i>wR</i> <sub>2</sub> = 0.1902      | <i>R</i> <sub>1</sub> = 0.0377<br><i>wR</i> <sub>2</sub> = 0.1028      |
| Largest peak/hole [eÅ <sup>-3</sup> ]             | 0.61/-0.58                                                             | 0.83/-0.39                                                             | 0.28/-0.31                                                             |

**Table S7.** Single crystal data of compounds **4g-4i**

|                                                                 | <b>4g</b>                                                                    | <b>4h</b>                                                              | <b>4i</b>                                                              |
|-----------------------------------------------------------------|------------------------------------------------------------------------------|------------------------------------------------------------------------|------------------------------------------------------------------------|
| CCDC number                                                     | 2407300                                                                      | 2245406                                                                | 2407301                                                                |
| Empirical formula                                               | C <sub>17</sub> H <sub>22</sub> N <sub>2</sub> O <sub>5</sub> S <sub>4</sub> | C <sub>15</sub> H <sub>16</sub> N <sub>2</sub> S                       | C <sub>17</sub> H <sub>20</sub> N <sub>2</sub> S                       |
| Formula weight                                                  | 462.60                                                                       | 256.36                                                                 | 284.41                                                                 |
| Temperature [K]                                                 | 301.31(10)                                                                   | 150.00(10)                                                             | 100.02(10)                                                             |
| Crystal system                                                  | monoclinic                                                                   | orthorhombic                                                           | orthorhombic                                                           |
| Space group (number)                                            | <i>C2/c</i> (15)                                                             | <i>Pbcn</i> (60)                                                       | <i>Pbca</i> (61)                                                       |
| <i>a</i> [Å]                                                    | 23.2186(4)                                                                   | 11.6219(2)                                                             | 10.7780(2)                                                             |
| <i>b</i> [Å]                                                    | 11.0403(2)                                                                   | 13.9013(2)                                                             | 9.33460(10)                                                            |
| <i>c</i> [Å]                                                    | 8.7466(2)                                                                    | 8.4102(2)                                                              | 30.4546(4)                                                             |
| $\alpha/\beta/\gamma$ [°]                                       | 90/108.1020(10)/90                                                           | 90/90/90                                                               | 90/90/90                                                               |
| Volume [Å <sup>3</sup> ]                                        | 2131.13(7)                                                                   | 1358.75(4)                                                             | 3063.99(8)                                                             |
| <i>Z</i>                                                        | 4                                                                            | 4                                                                      | 8                                                                      |
| $\rho_{\text{calc}}$ [gcm <sup>-3</sup> ]                       | 1.442                                                                        | 1.253                                                                  | 1.233                                                                  |
| $\mu$ [mm <sup>-1</sup> ]                                       | 4.371                                                                        | 1.965                                                                  | 1.790                                                                  |
| <i>F</i> (000)                                                  | 968                                                                          | 544                                                                    | 1216                                                                   |
| Crystal size [mm <sup>3</sup> ]                                 | 0.08×0.08×0.12                                                               | 0.02×0.01×0.01                                                         | 0.08×0.1×0.12                                                          |
| Crystal colour                                                  | clear colourless                                                             | colourless                                                             | colourless                                                             |
| Crystal shape                                                   | needle                                                                       | needle                                                                 | plate                                                                  |
| Radiation                                                       | Cu <i>K</i> $\alpha$ ( $\lambda=1.54178$<br>Å)                               | Cu <i>K</i> $\alpha$<br>( $\lambda=1.54184$ Å)                         | Cu <i>K</i> $\alpha$<br>( $\lambda=1.54184$ Å)                         |
| 2 $\theta$ range [°]                                            | 8.01 to 147.29<br>(0.80 Å)                                                   | 9.92 to 147.93<br>(0.80 Å)                                             | 5.80 to 154.57<br>(0.79 Å)                                             |
| Index ranges                                                    | -28 ≤ <i>h</i> ≤ 26<br>-13 ≤ <i>k</i> ≤ 13<br>-6 ≤ <i>l</i> ≤ 10             | -13 ≤ <i>h</i> ≤ 14<br>-16 ≤ <i>k</i> ≤ 17<br>-5 ≤ <i>l</i> ≤ 9        | -13 ≤ <i>h</i> ≤ 10<br>-11 ≤ <i>k</i> ≤ 11<br>-35 ≤ <i>l</i> ≤ 38      |
| Reflections collected                                           | 5086<br>2015                                                                 | 4973<br>1331                                                           | 15574<br>3129                                                          |
| Independent reflections                                         | <i>R</i> <sub>int</sub> = 0.0215<br><i>R</i> <sub>sigma</sub> = 0.0244       | <i>R</i> <sub>int</sub> = 0.0177<br><i>R</i> <sub>sigma</sub> = 0.0162 | <i>R</i> <sub>int</sub> = 0.0336<br><i>R</i> <sub>sigma</sub> = 0.0242 |
| Completeness to<br>$\theta = 67.684^\circ$                      | 96.8                                                                         | 98.8 %                                                                 | 99.9                                                                   |
| Data / Restraints /<br>Parameters                               | 2015 / 4 / 150                                                               | 1331/0/84                                                              | 3129 / 0 / 183                                                         |
| Goodness-of-fit on <i>F</i> <sup>2</sup>                        | 1.096                                                                        | 1.058                                                                  | 1.072                                                                  |
| Final <i>R</i> indexes<br>[ <i>I</i> ≥ 2 $\sigma$ ( <i>I</i> )] | <i>R</i> <sub>1</sub> = 0.0399<br>w <i>R</i> <sub>2</sub> = 0.1176           | <i>R</i> <sub>1</sub> = 0.0340<br>w <i>R</i> <sub>2</sub> = 0.0927     | <i>R</i> <sub>1</sub> = 0.0353<br>w <i>R</i> <sub>2</sub> = 0.0953     |
| Final <i>R</i> indexes<br>[all data]                            | <i>R</i> <sub>1</sub> = 0.0413<br>w <i>R</i> <sub>2</sub> = 0.1192           | <i>R</i> <sub>1</sub> = 0.0352<br>w <i>R</i> <sub>2</sub> = 0.0937     | <i>R</i> <sub>1</sub> = 0.0387<br>w <i>R</i> <sub>2</sub> = 0.0980     |
| Largest peak/hole [eÅ <sup>-3</sup> ]                           | 0.44/-0.48                                                                   | 0.22/-0.33                                                             | 0.30/-0.34                                                             |

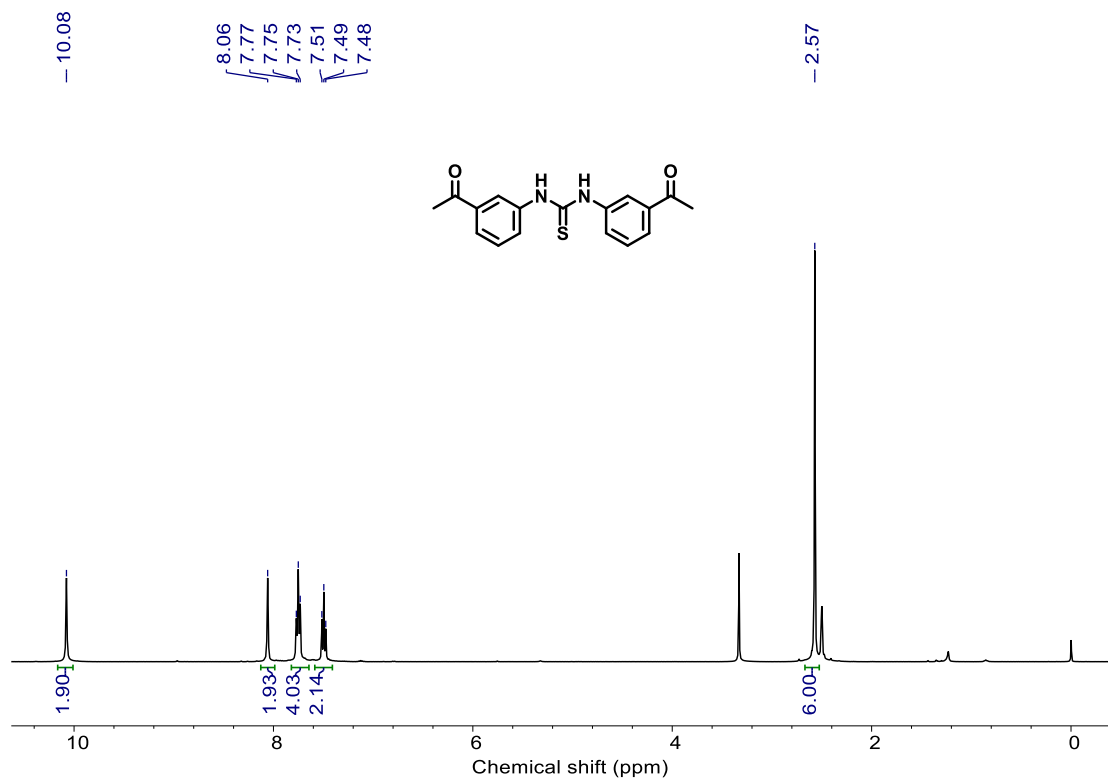

**Figure S17.** <sup>1</sup>H NMR spectrum of **4a** in DMSO-*d*<sub>6</sub>.

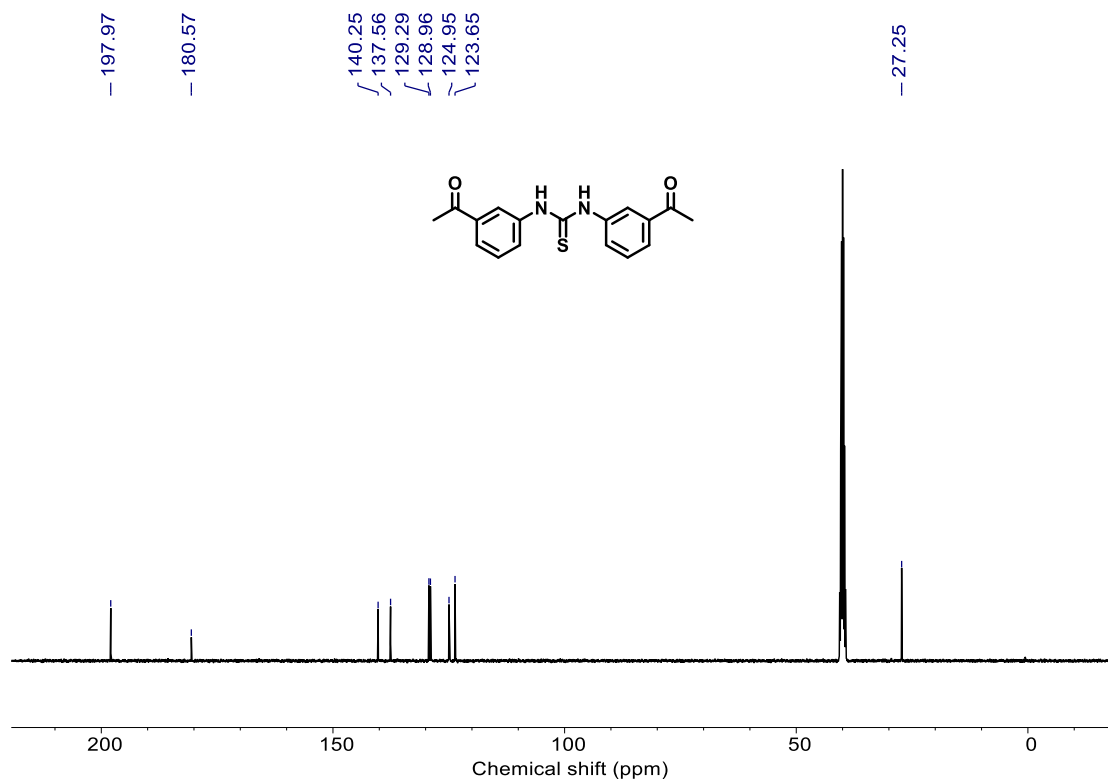

**Figure S18.** <sup>13</sup>C NMR spectrum of **4a** in DMSO-*d*<sub>6</sub>.

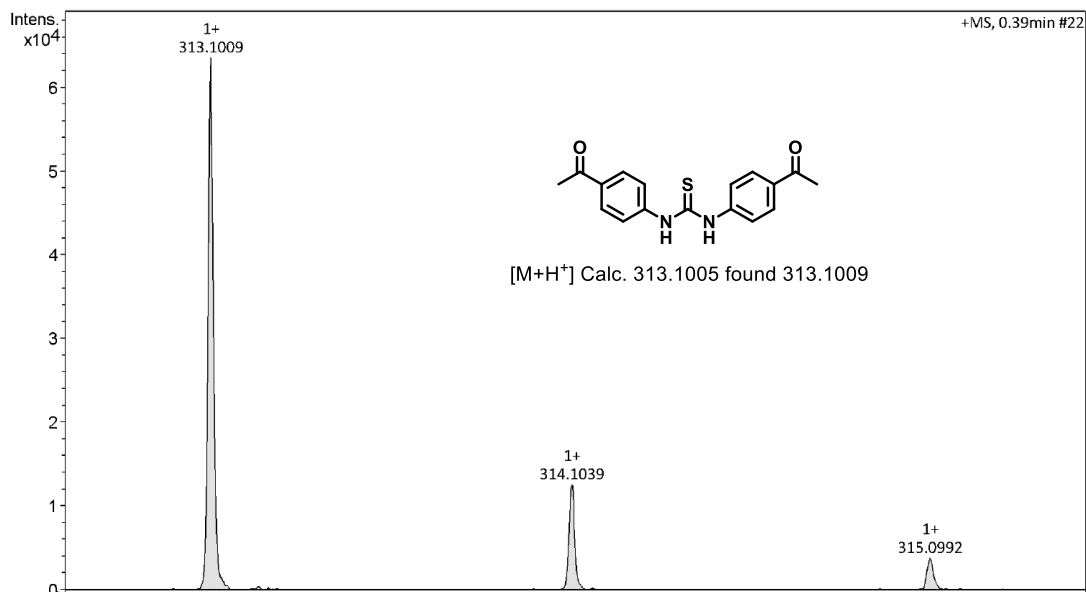

**Figure S19.** HR-MS spectrum of **4a**.

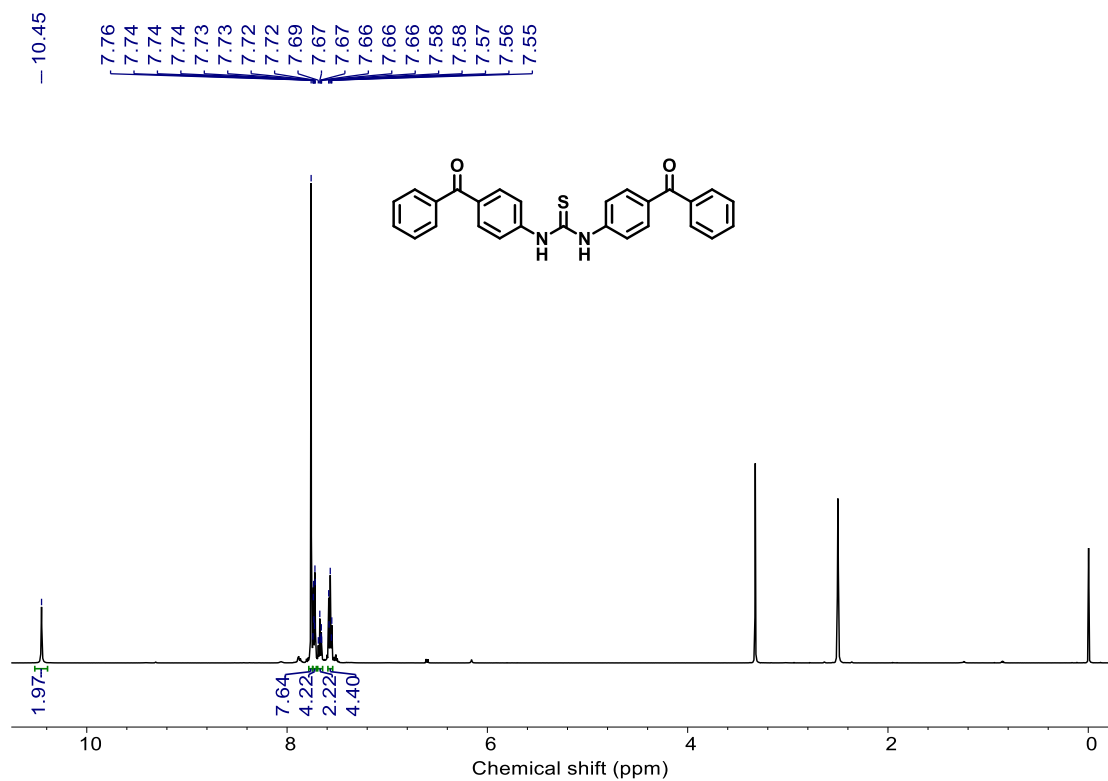

**Figure S20.** <sup>1</sup>H NMR spectrum of **4b** in DMSO-*d*<sub>6</sub>.

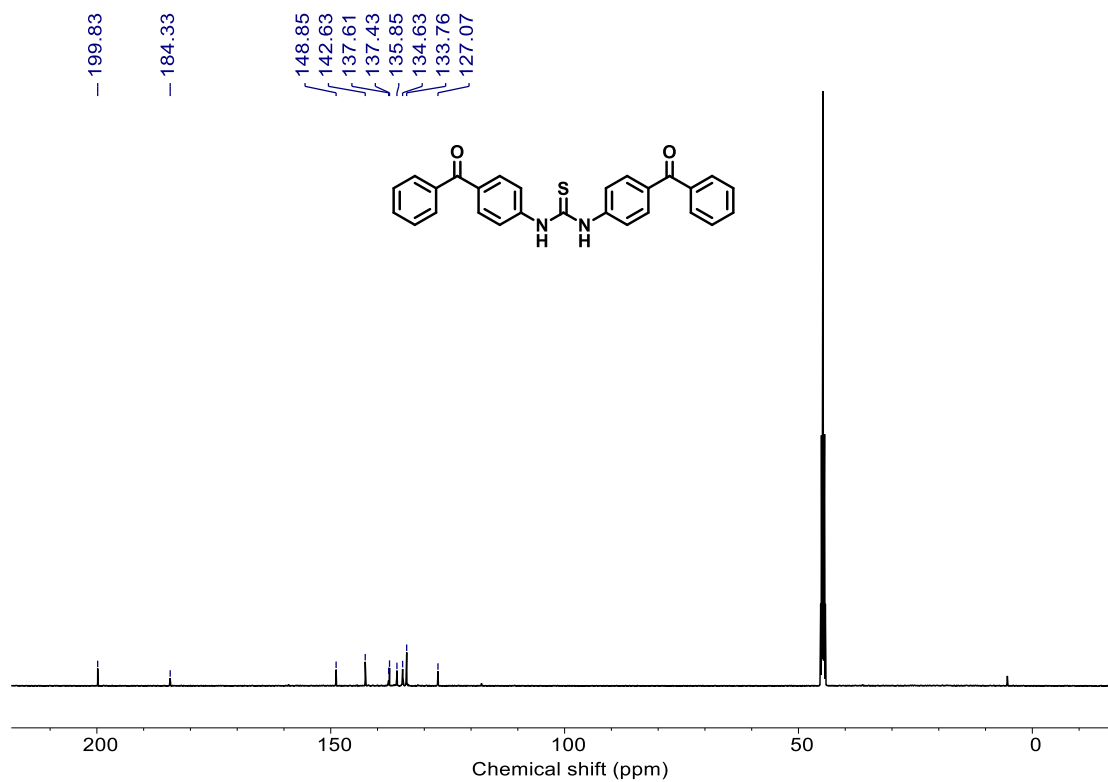

**Figure S21.**  $^{13}\text{C}$  NMR spectrum of **4b** in  $\text{DMSO-}d_6$ .

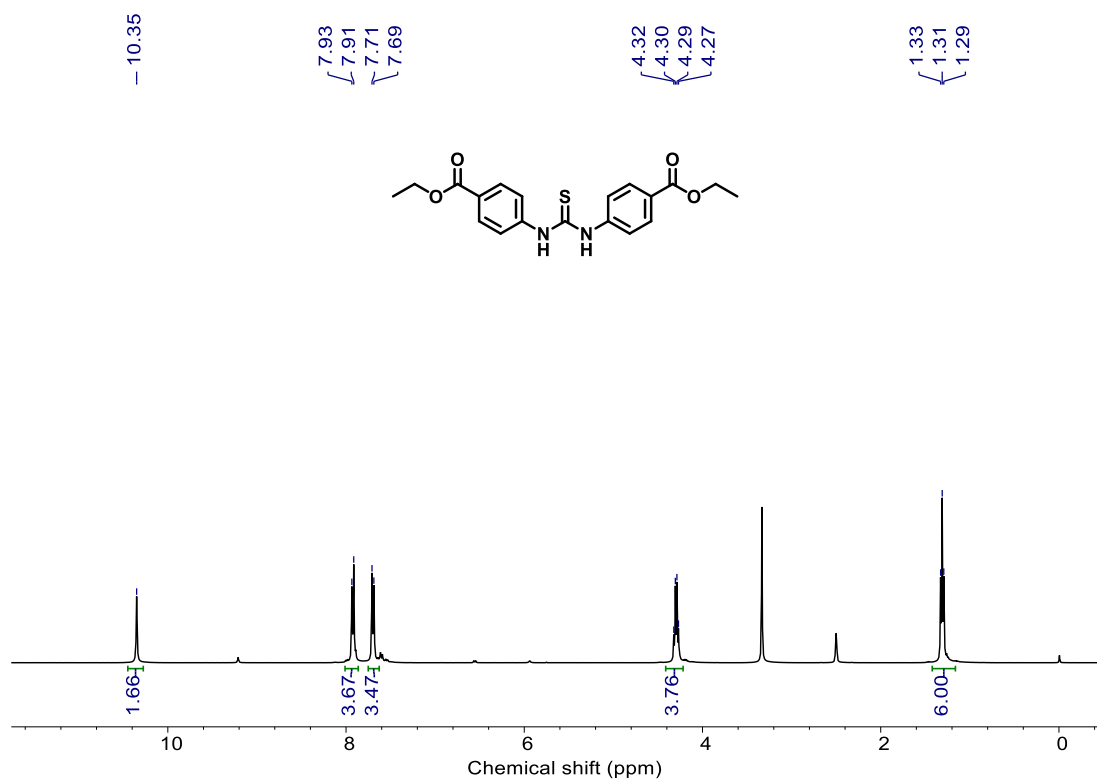

**Figure S22.**  $^1\text{H}$  NMR spectrum of **4c** in  $\text{DMSO-}d_6$ .



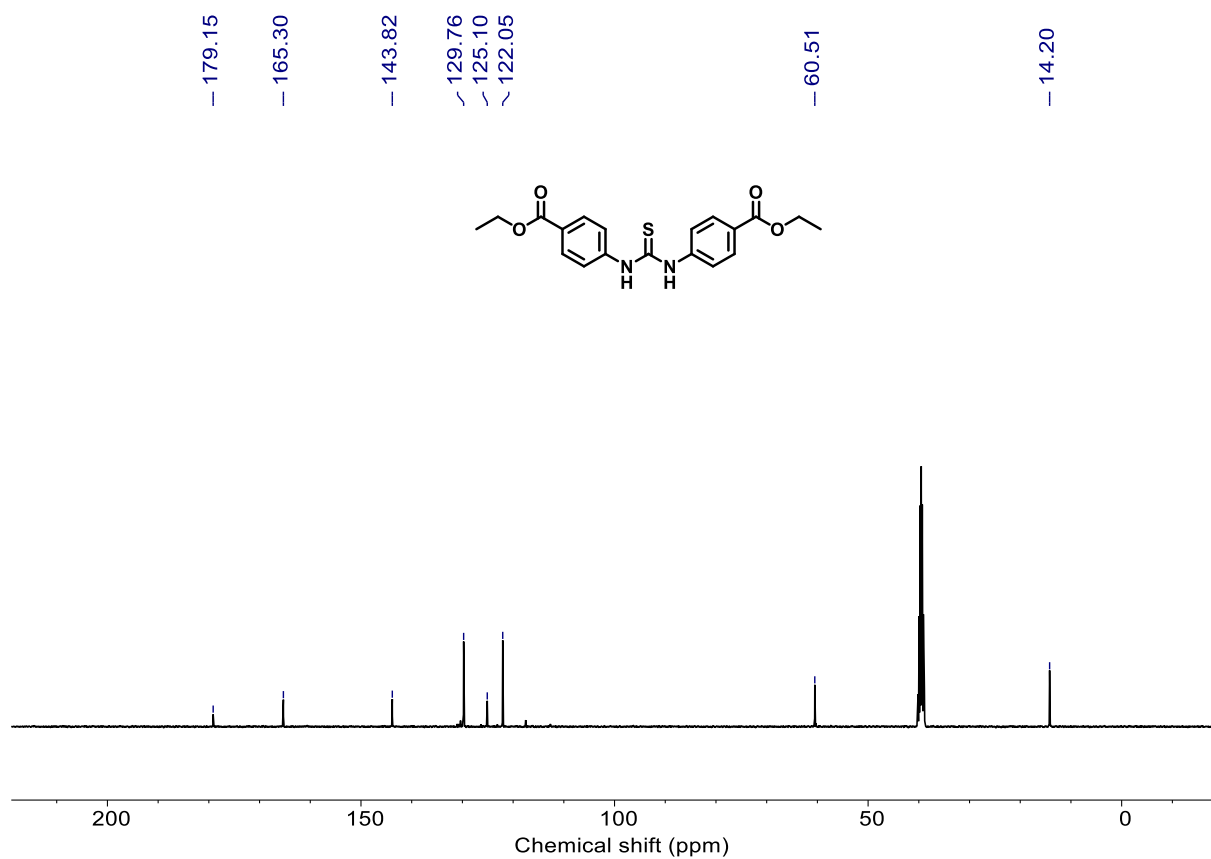

**Figure S23.** <sup>13</sup>C NMR spectrum of 4c in DMSO-d<sub>6</sub>.

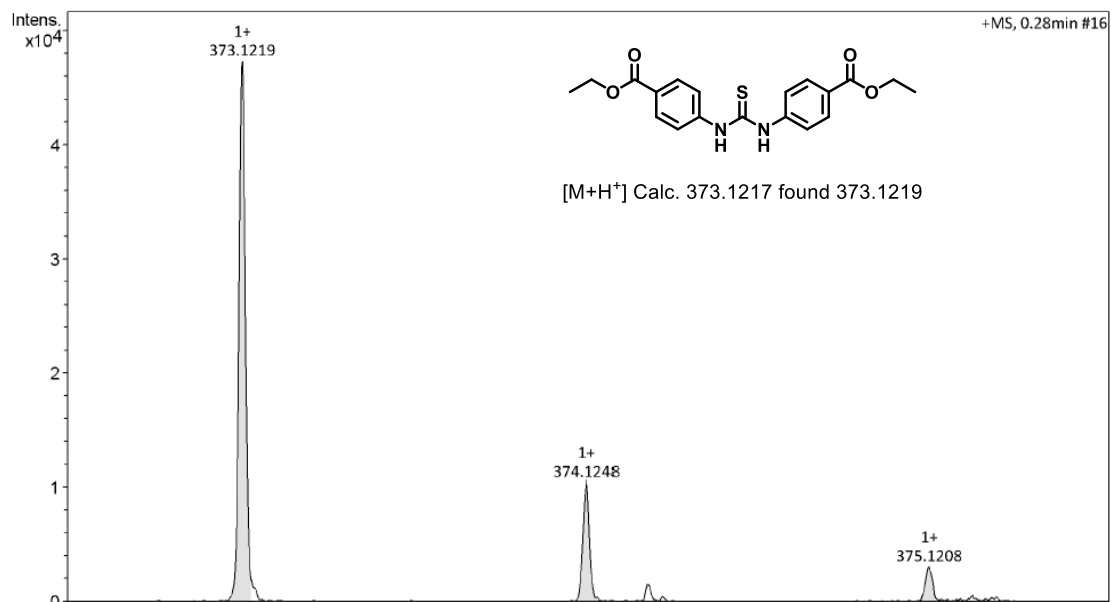

**Figure S24.** HR-MS spectrum of 4c.

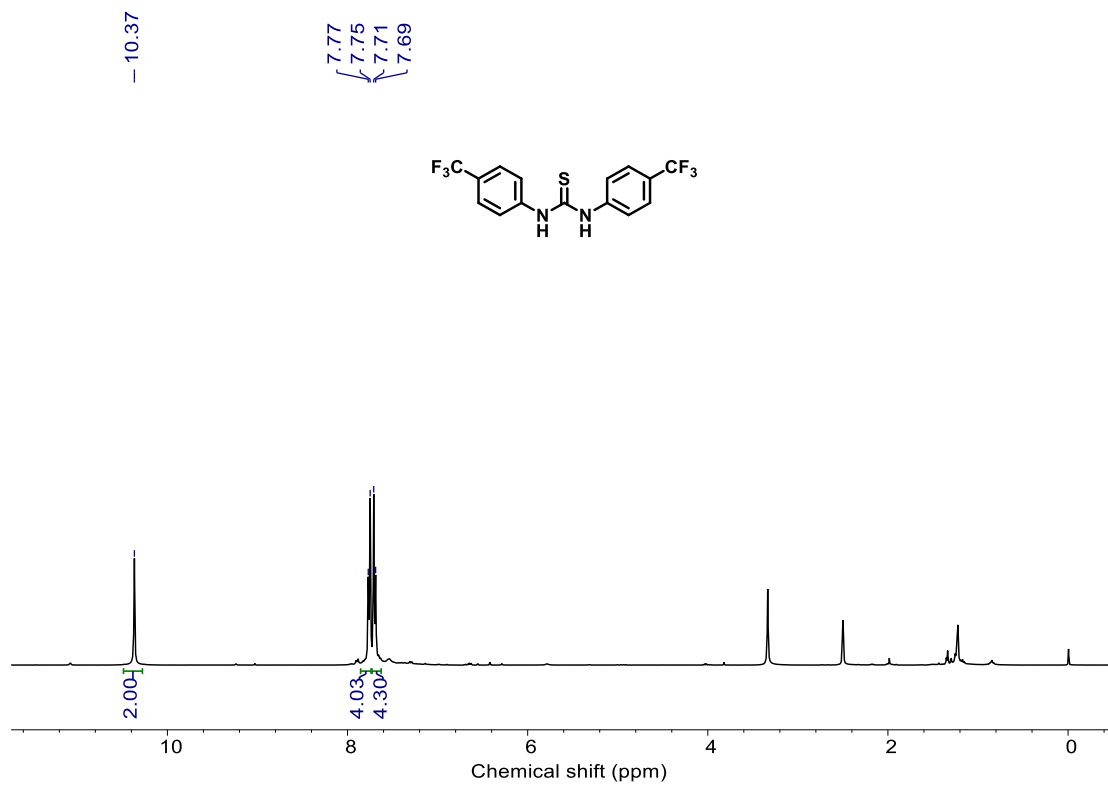

**Figure S25.**  $^1\text{H}$  NMR spectrum of **4d** in  $\text{DMSO-}d_6$ .

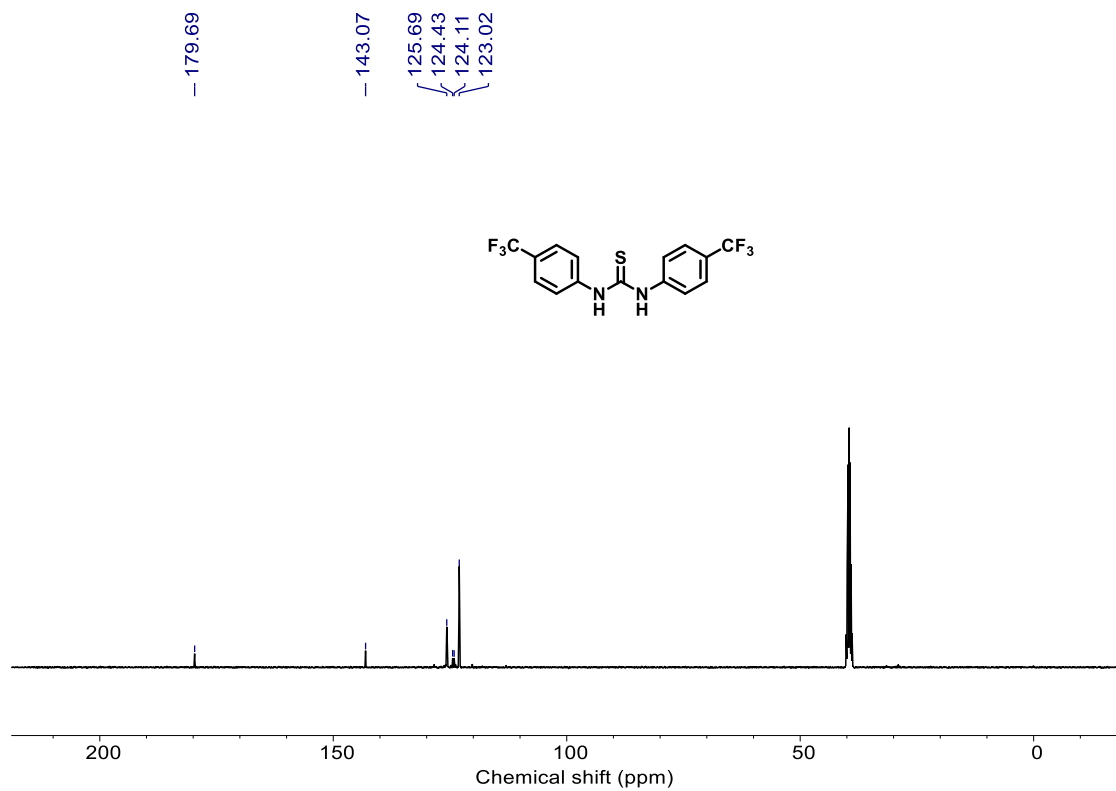

**Figure S26.**  $^{13}\text{C}$  NMR spectrum of **4d** in  $\text{DMSO-}d_6$ .

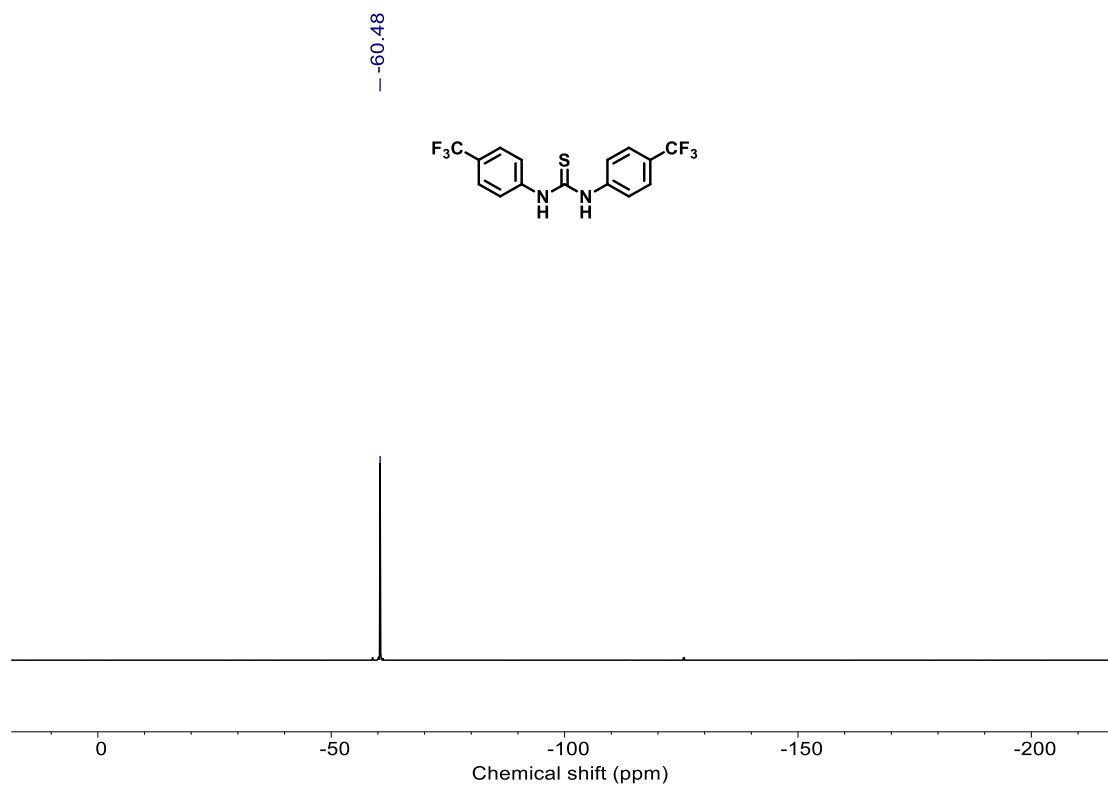

**Figure S27.**  $^{19}\text{F}$  NMR spectrum of **4d** in  $\text{DMSO-}d_6$ .

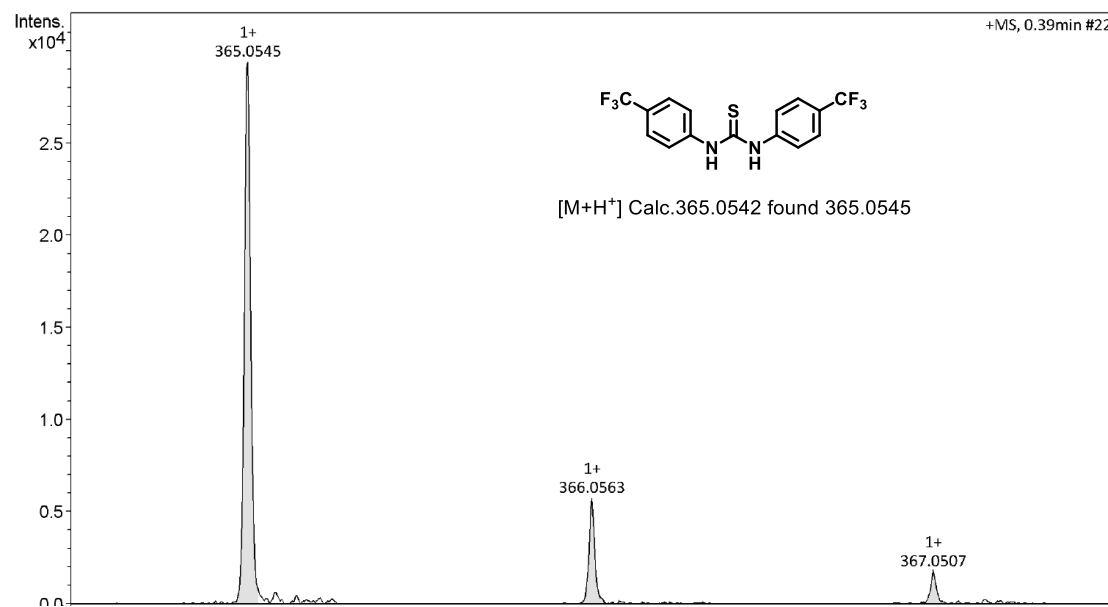

**Figure S28.** HR-MS spectrum of **4d**.

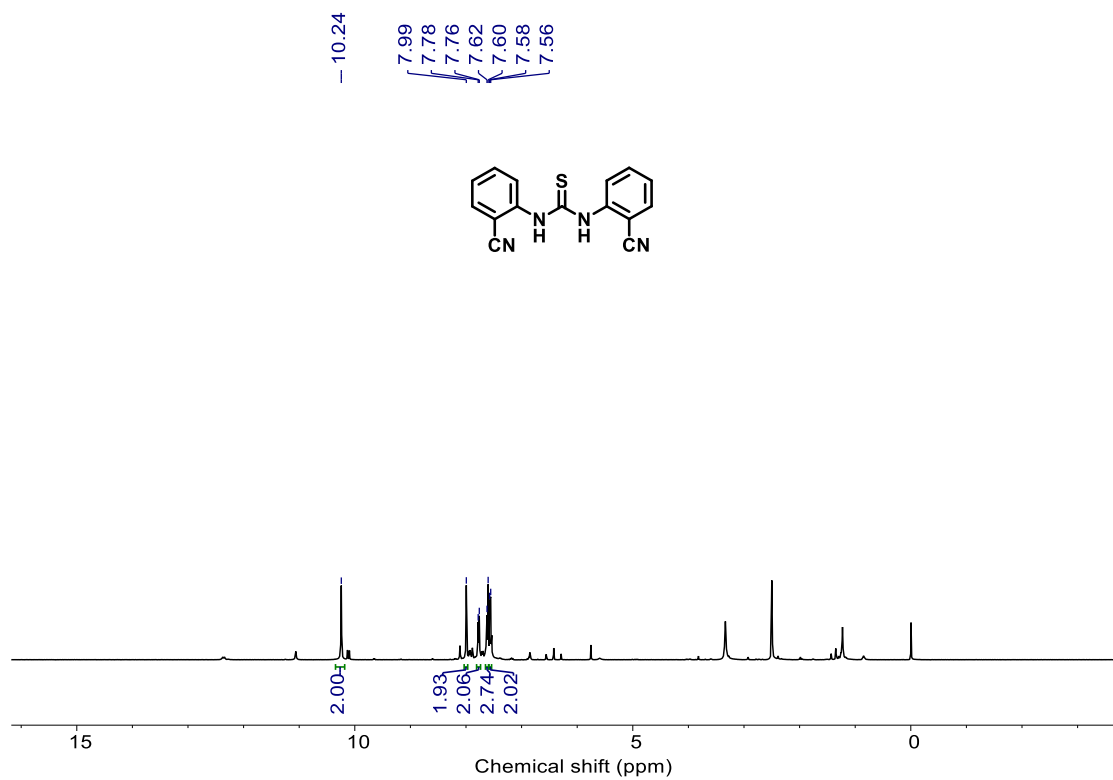

**Figure S29.**  $^1\text{H}$  NMR spectrum of **4e** in  $\text{DMSO-}d_6$ .

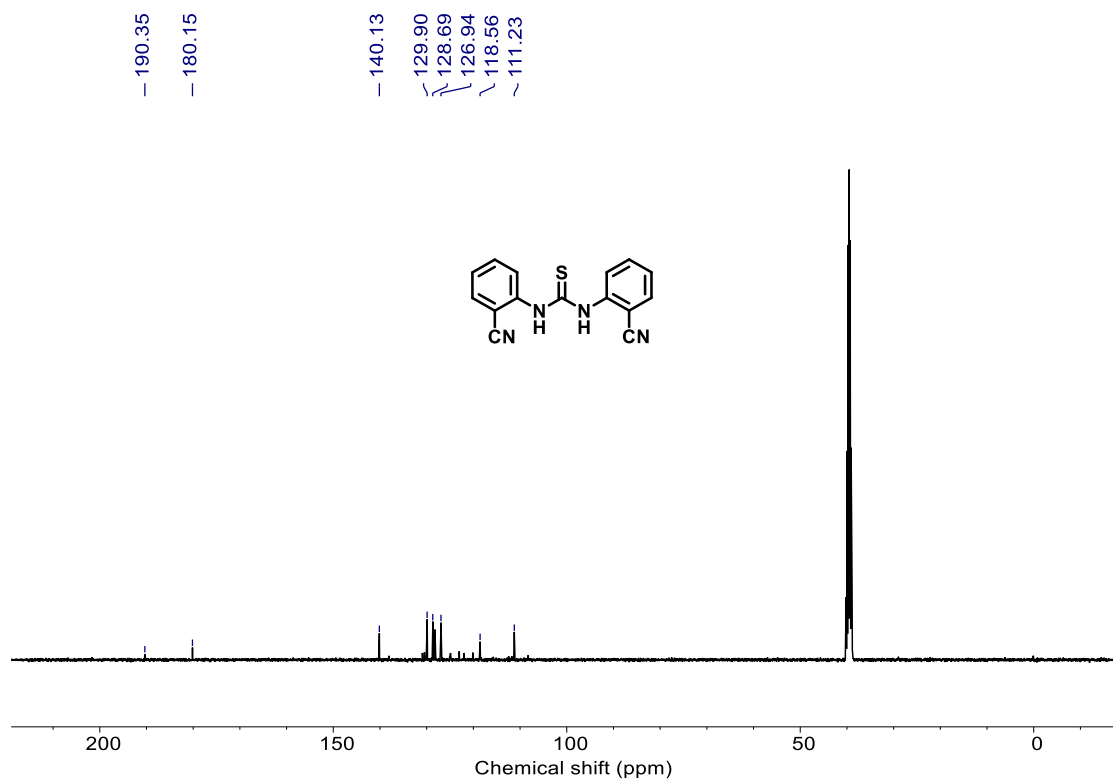

**Figure S30.**  $^{13}\text{C}$  NMR spectrum of **4e** in  $\text{DMSO-}d_6$ .

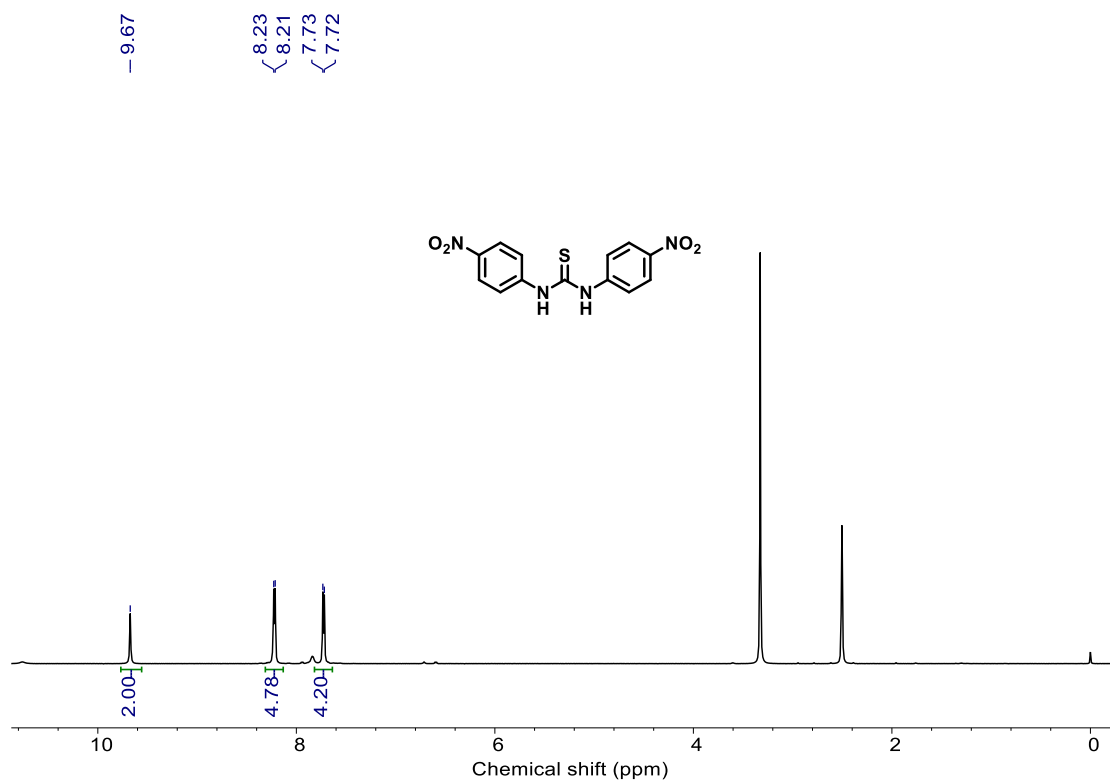

**Figure S31.**  $^1\text{H}$  NMR spectrum of **4f** in  $\text{DMSO-}d_6$ .

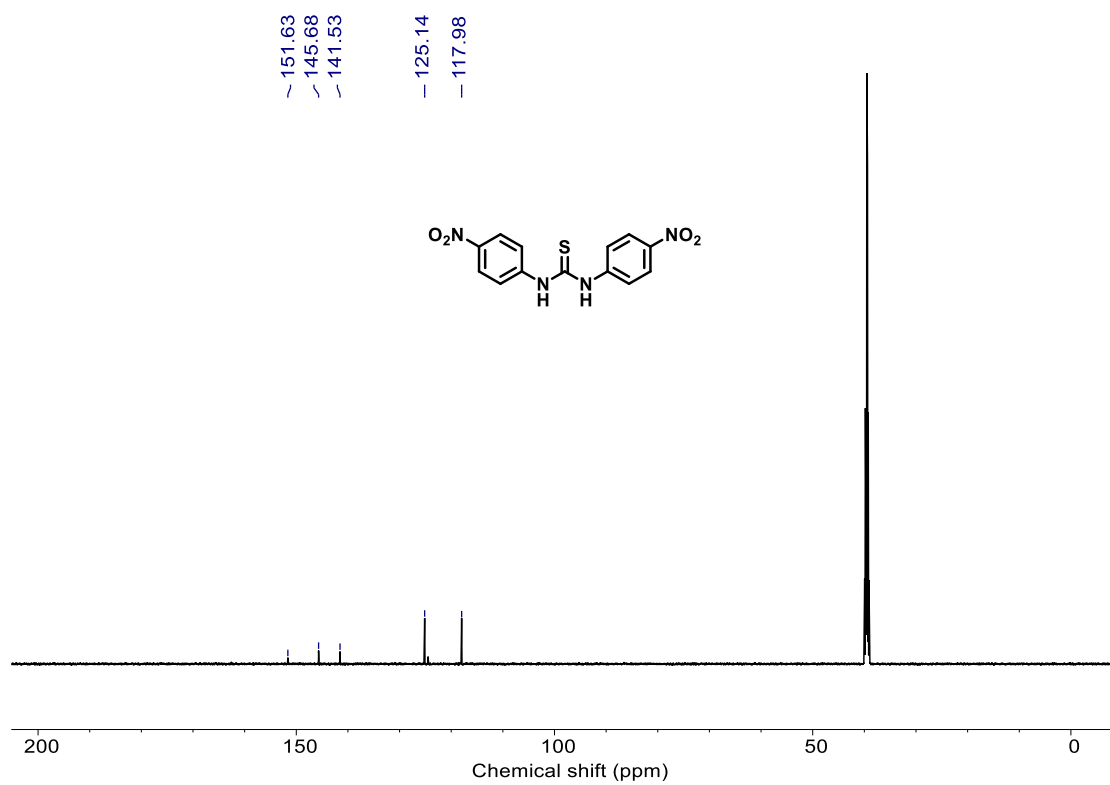

**Figure S32.**  $^{13}\text{C}$  NMR spectrum of **4f** in  $\text{DMSO-}d_6$ .

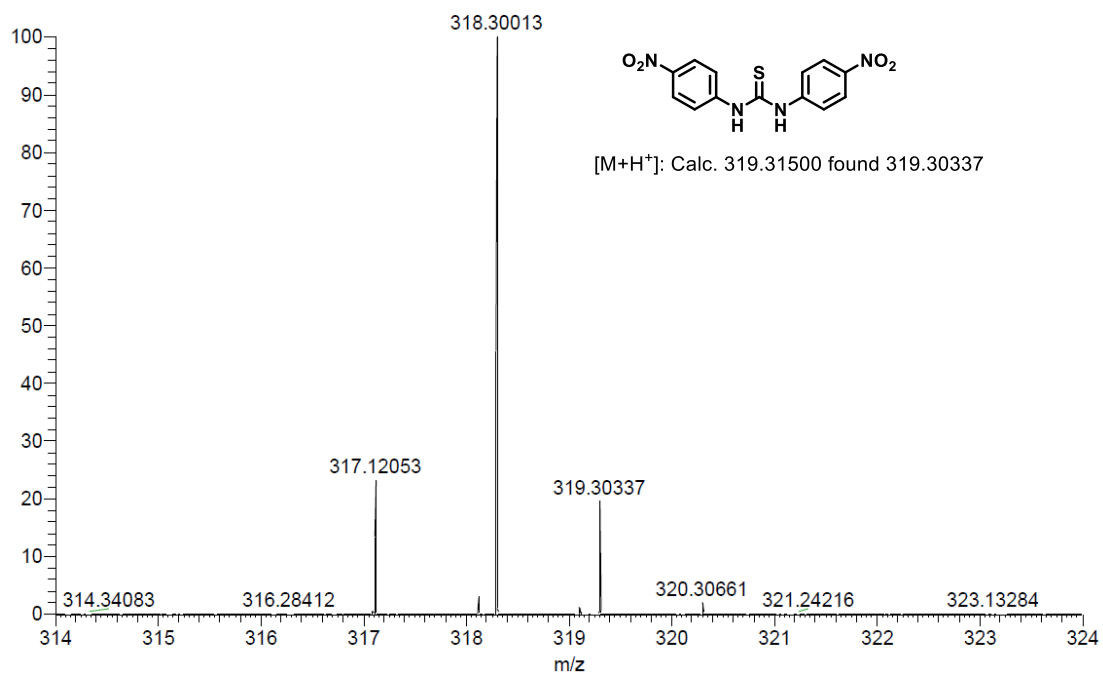

Figure S33. HR-MS spectrum of **4f**.

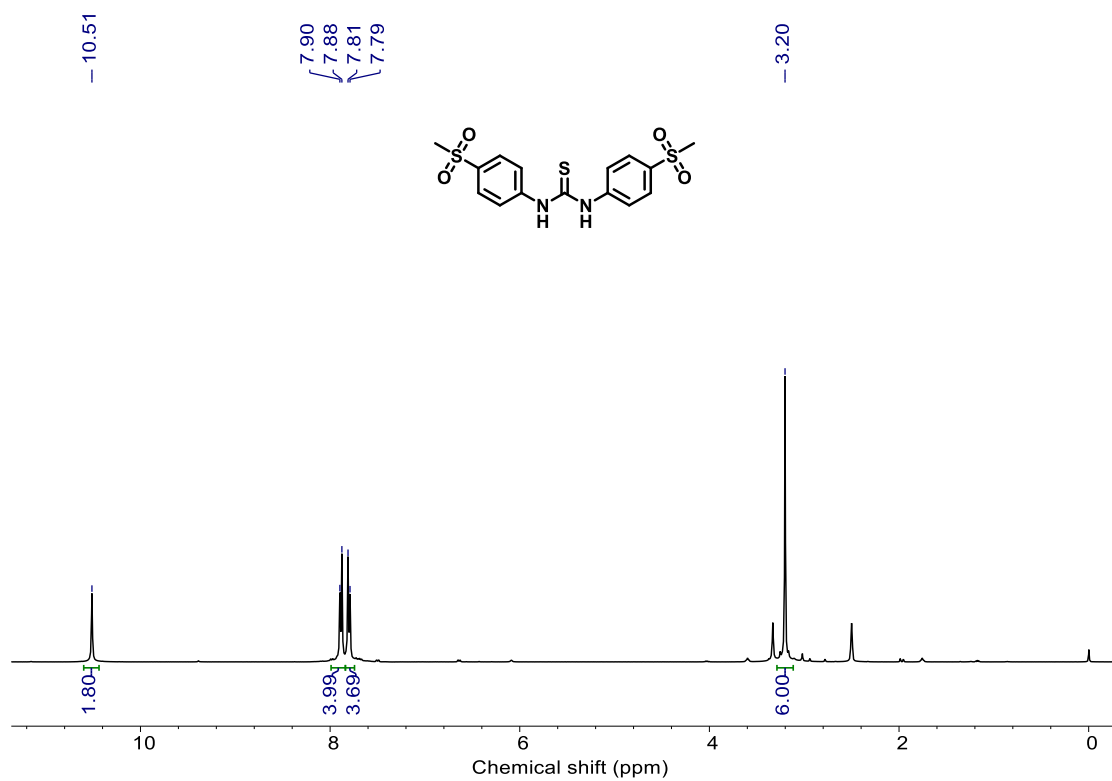

Figure S34. <sup>1</sup>H NMR spectrum of **4g** in DMSO-*d*<sub>6</sub>.

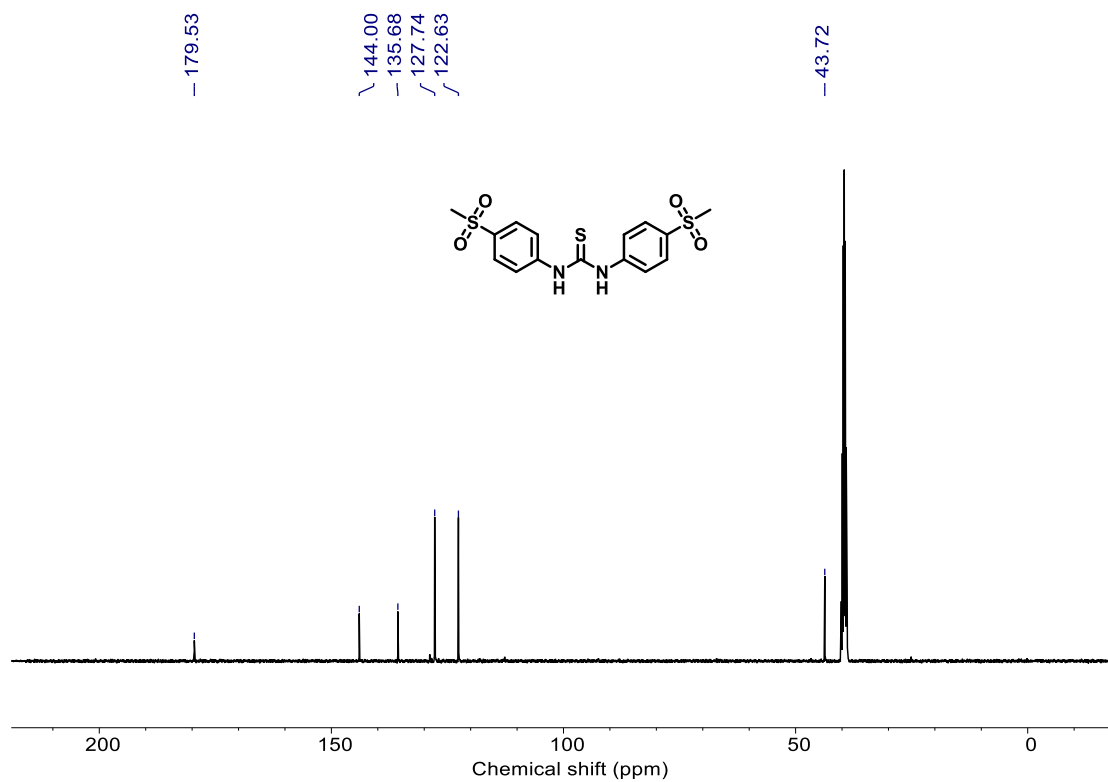

**Figure S35.**  $^{13}\text{C}$  NMR spectrum of **4g** in  $\text{DMSO-}d_6$ .

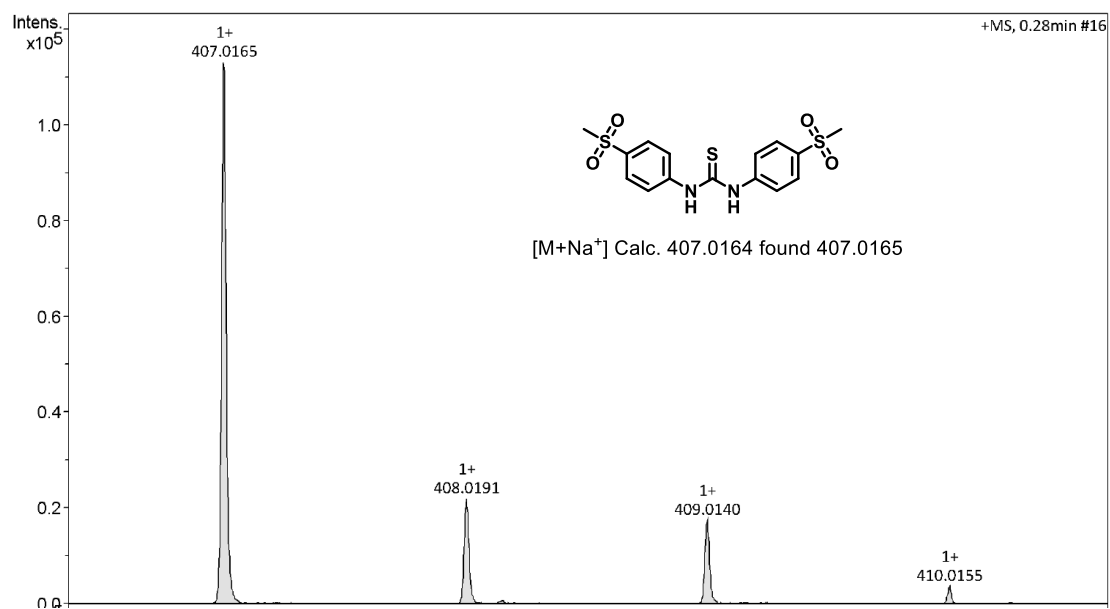

**Figure S36.** HR-MS spectrum of **4g**.

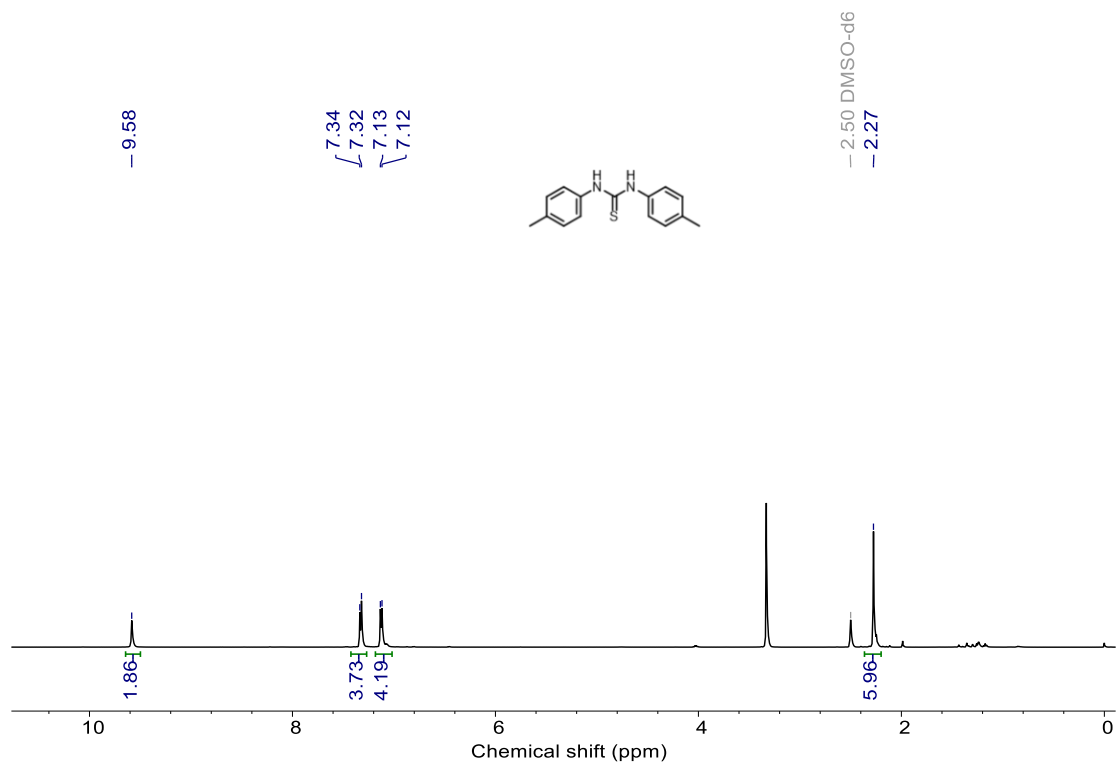

**Figure S37.**  $^1\text{H}$  NMR spectrum of **4h** in  $\text{DMSO-}d_6$ .

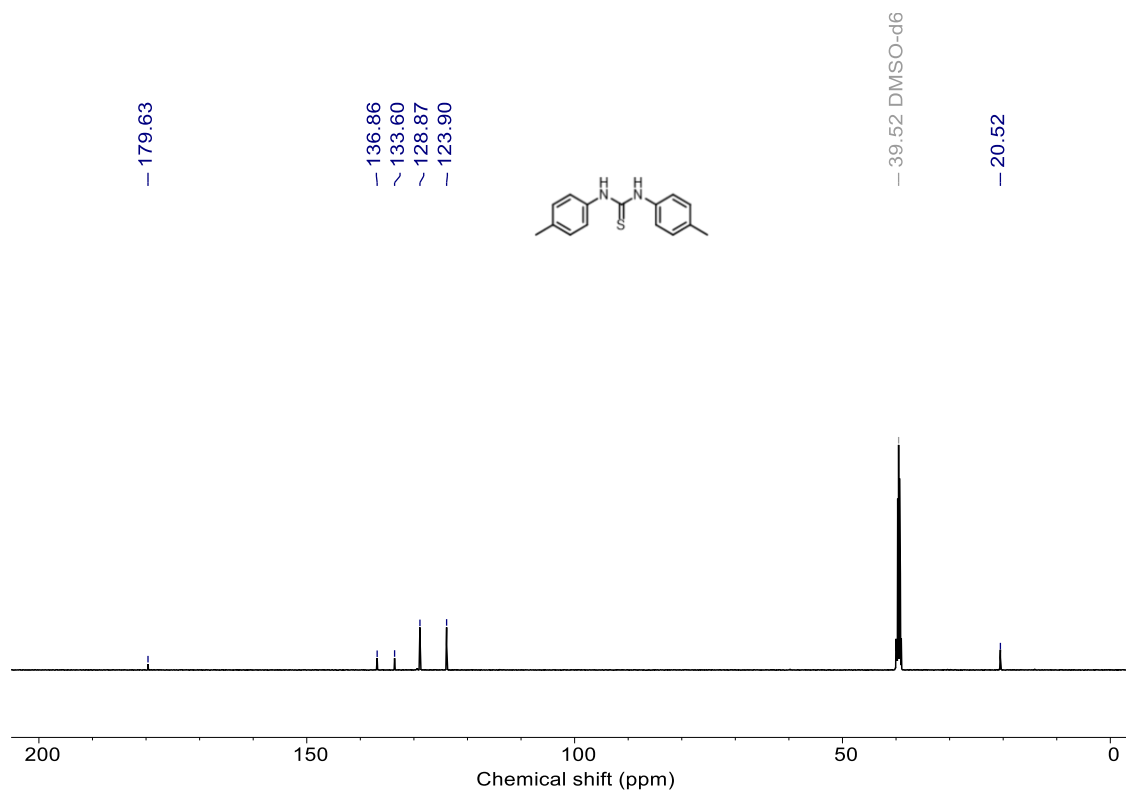

**Figure S38.**  $^{13}\text{C}$  NMR spectrum of **4h** in  $\text{DMSO-}d_6$ .



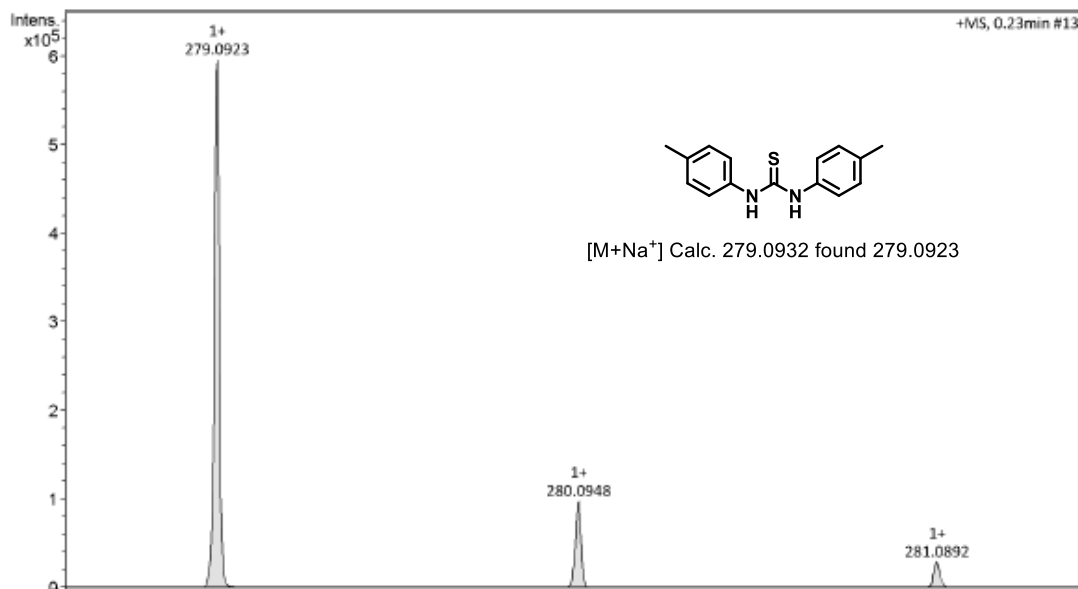

**Figure S39.** HR-MS spectrum of **4h**.

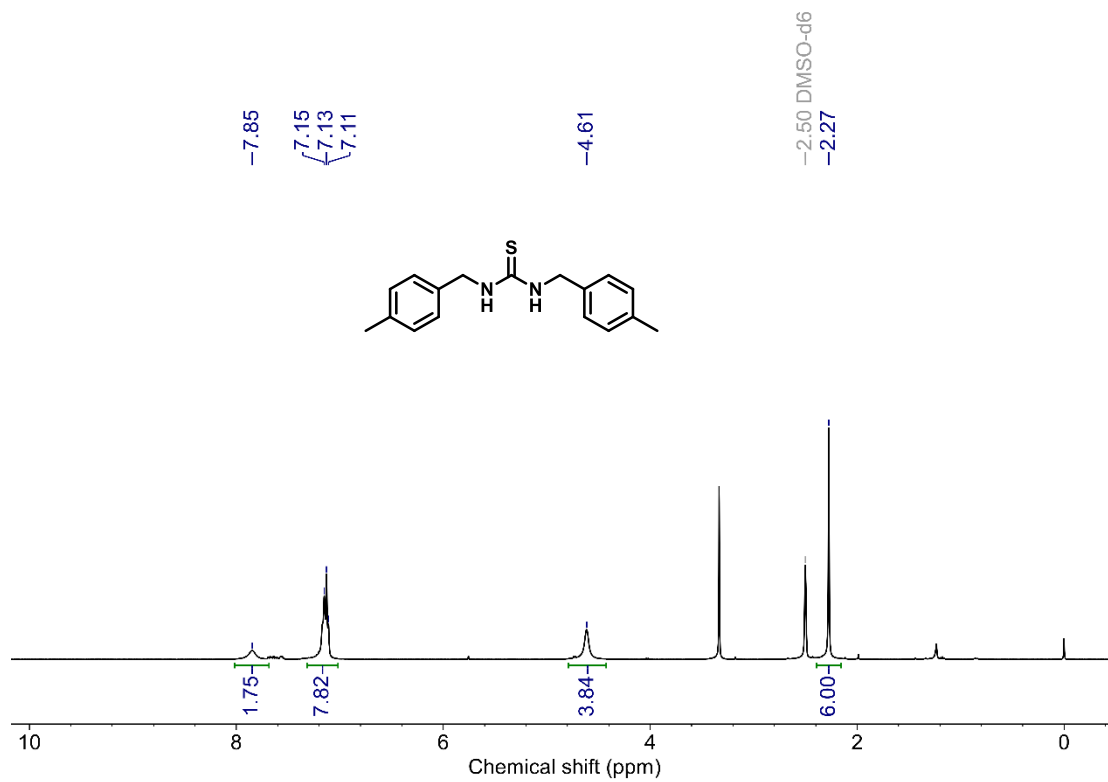

**Figure S40.** <sup>1</sup>H NMR spectrum of **4i** in DMSO-*d*<sub>6</sub>.

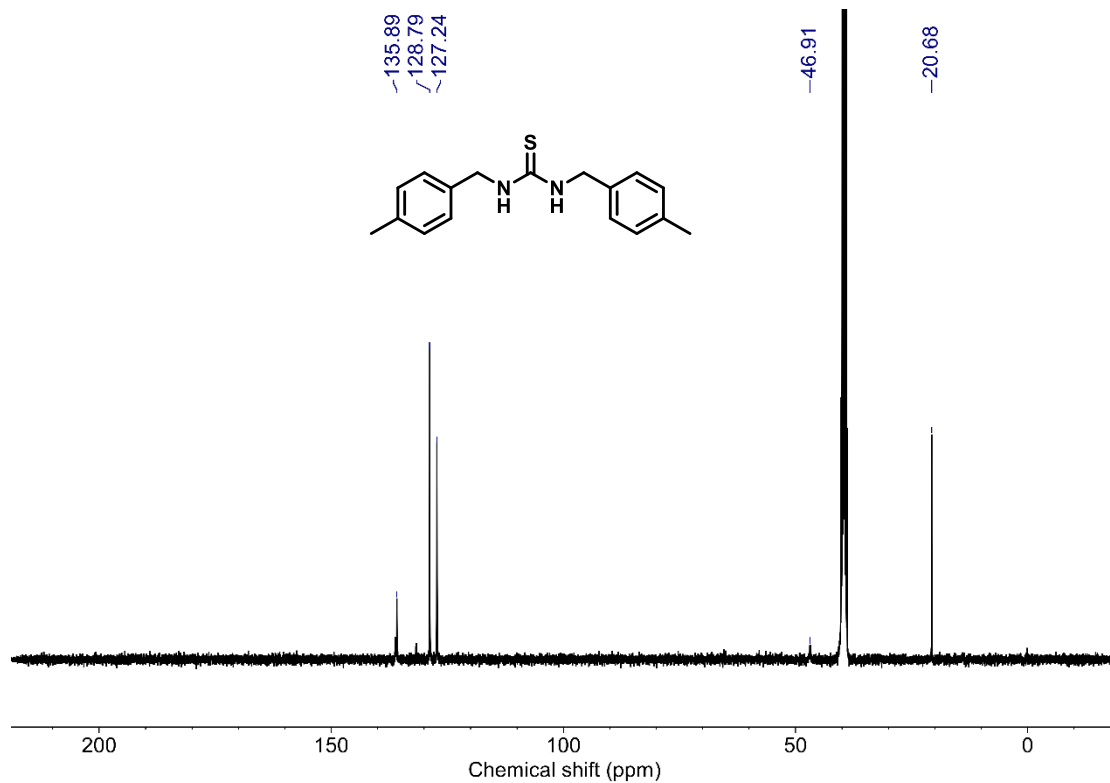

**Figure S41.** <sup>13</sup>C NMR spectrum of **4i** in DMSO-*d*<sub>6</sub>.

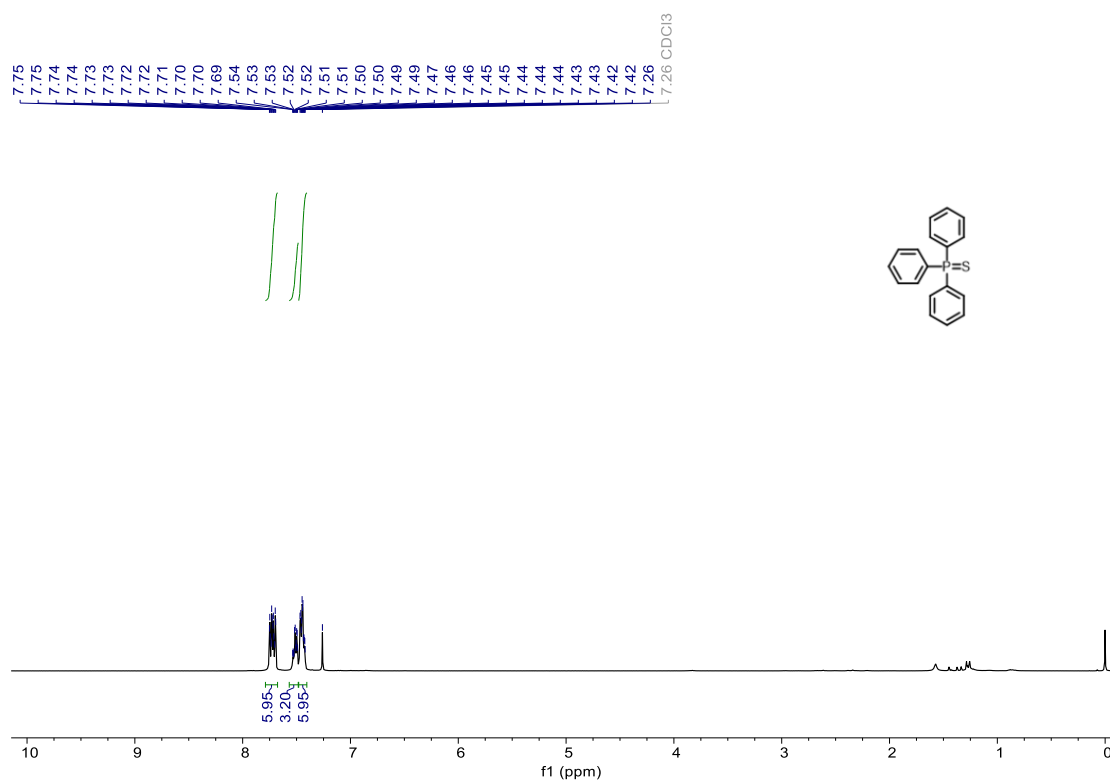

**Figure S42.** <sup>1</sup>H NMR spectrum of Ph<sub>3</sub>P=S in CDCl<sub>3</sub>.

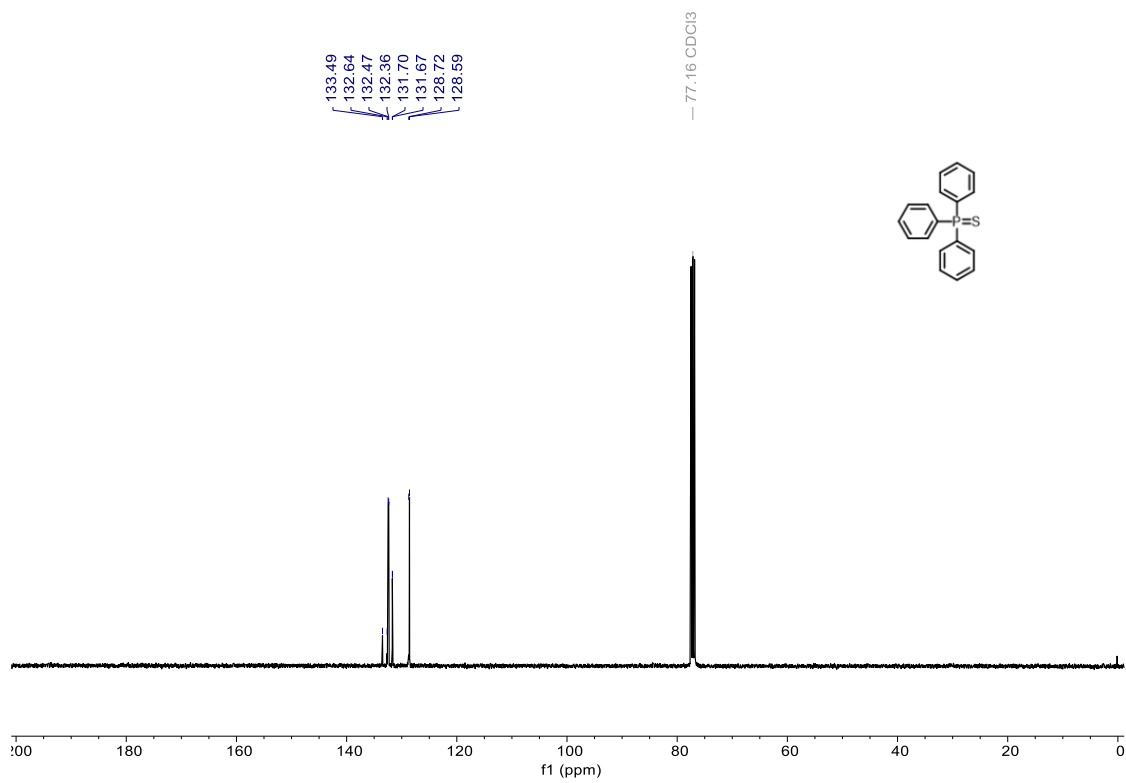

**Figure S43.** <sup>13</sup>C NMR spectrum of Ph<sub>3</sub>P=S in CDCl<sub>3</sub>.

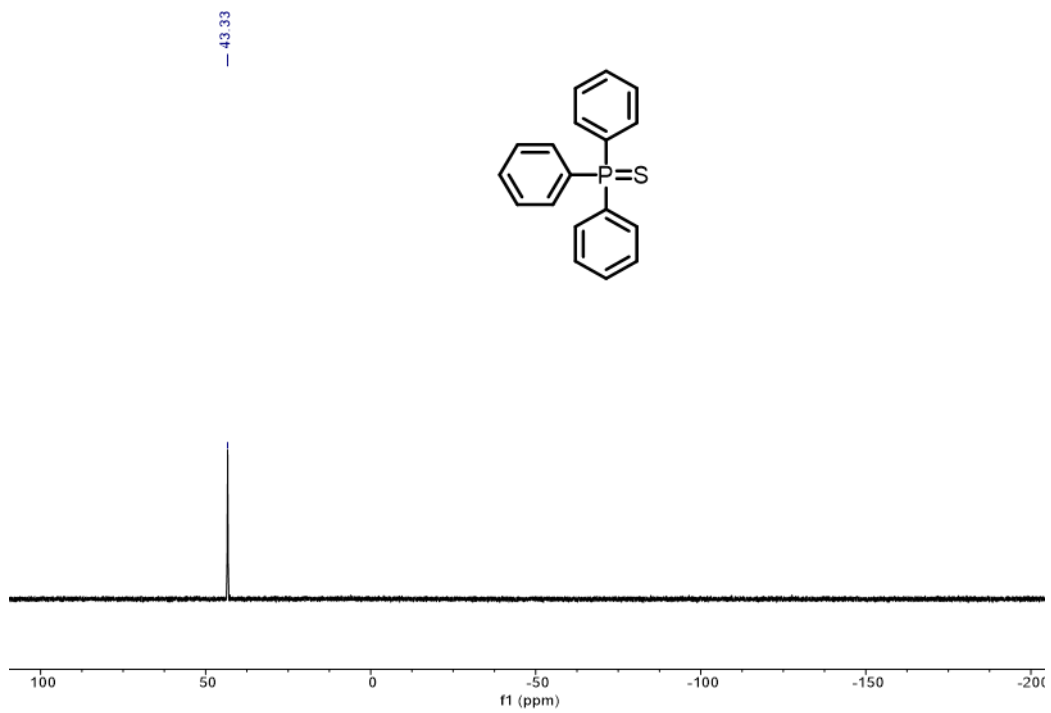

**Figure S44.** <sup>31</sup>P NMR spectrum of Ph<sub>3</sub>P=S in CDCl<sub>3</sub>.

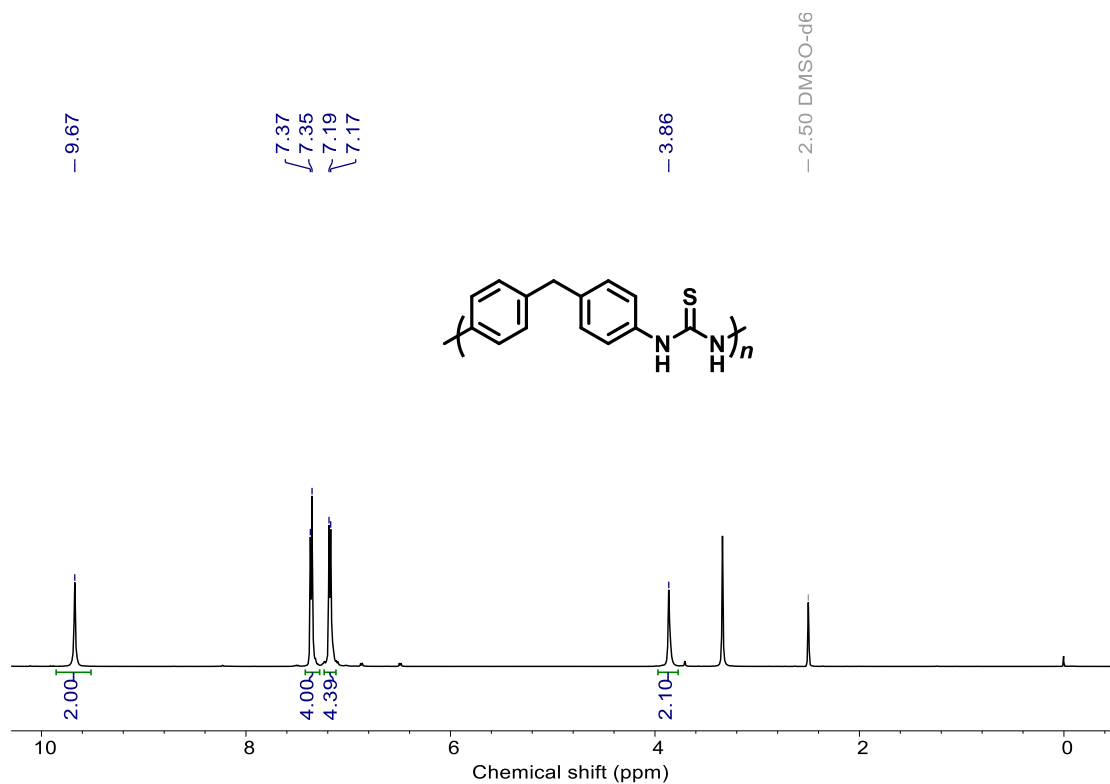

**Figure S45.**  $^1\text{H}$  NMR spectrum of **P1** in  $\text{DMSO-}d_6$ .

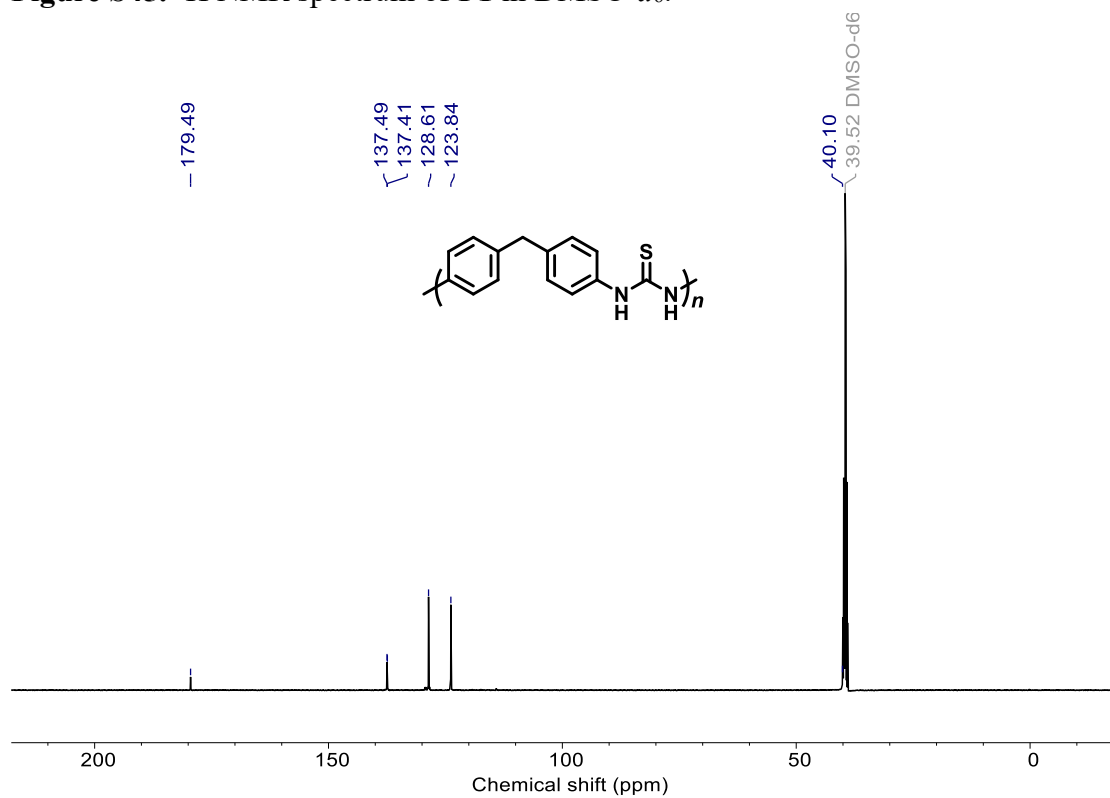

**Figure S46.**  $^{13}\text{C}$  NMR spectrum of **P1** in  $\text{DMSO-}d_6$ .

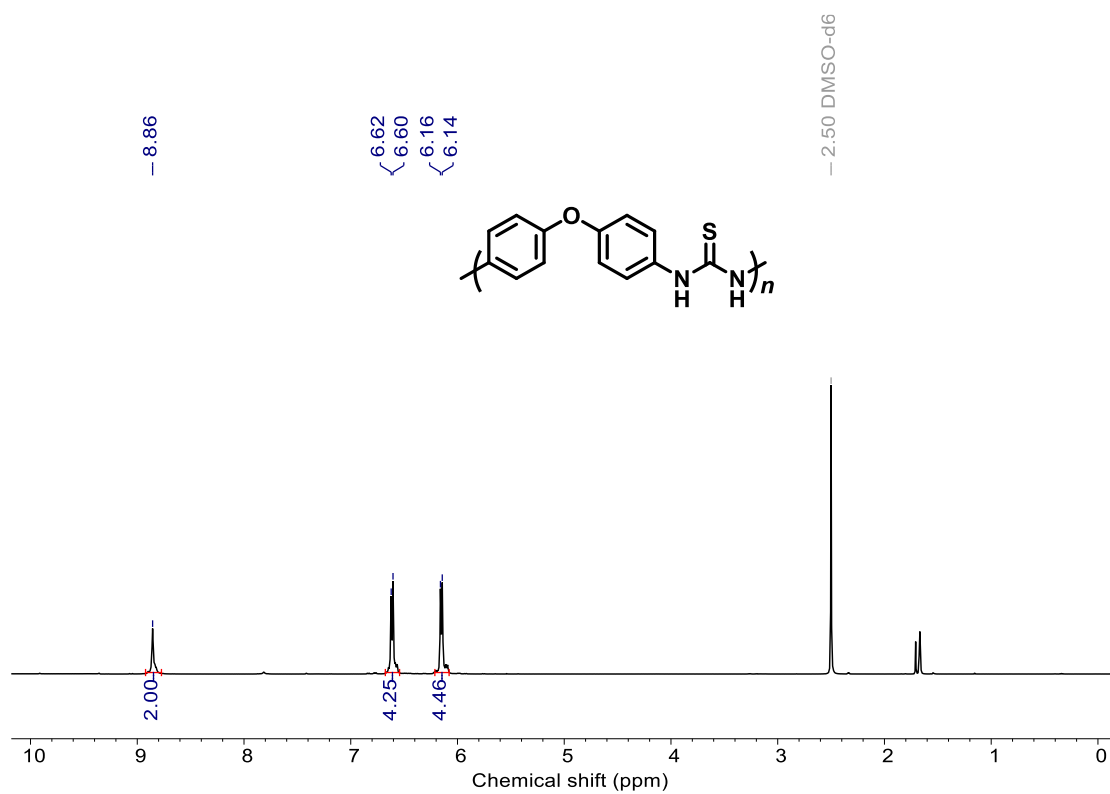

**Figure S47.** <sup>1</sup>H NMR spectrum of P2 in DMSO-*d*<sub>6</sub>.

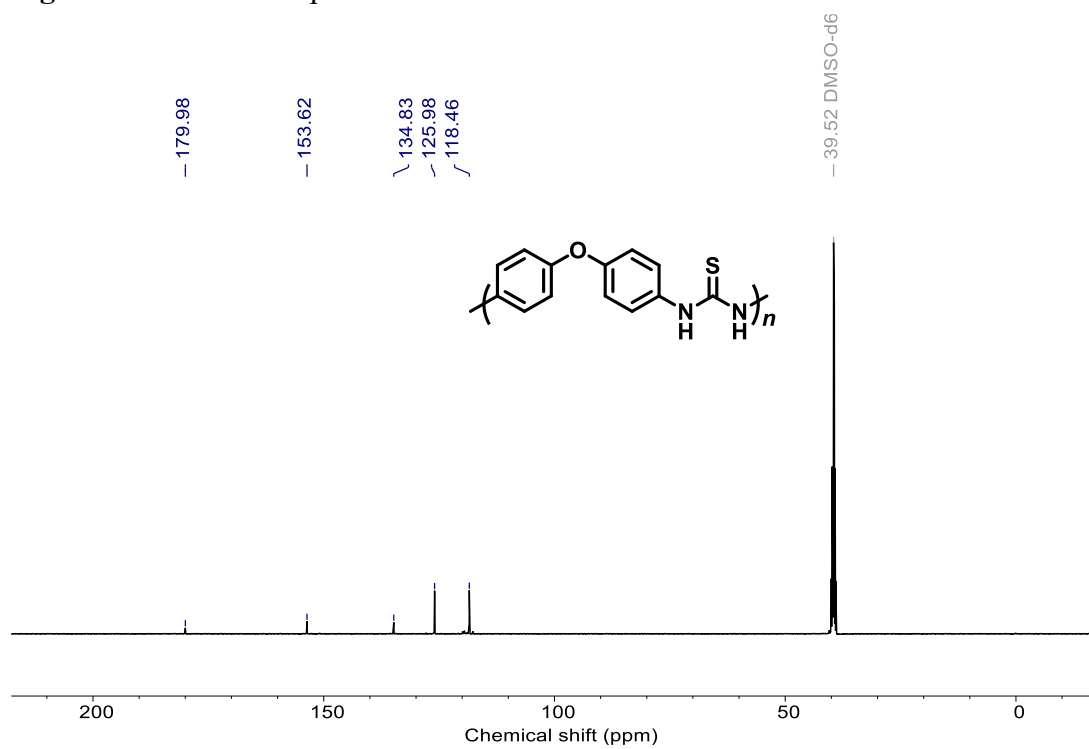

**Figure S48.** <sup>13</sup>C NMR spectrum of P2 in DMSO-*d*<sub>6</sub>.

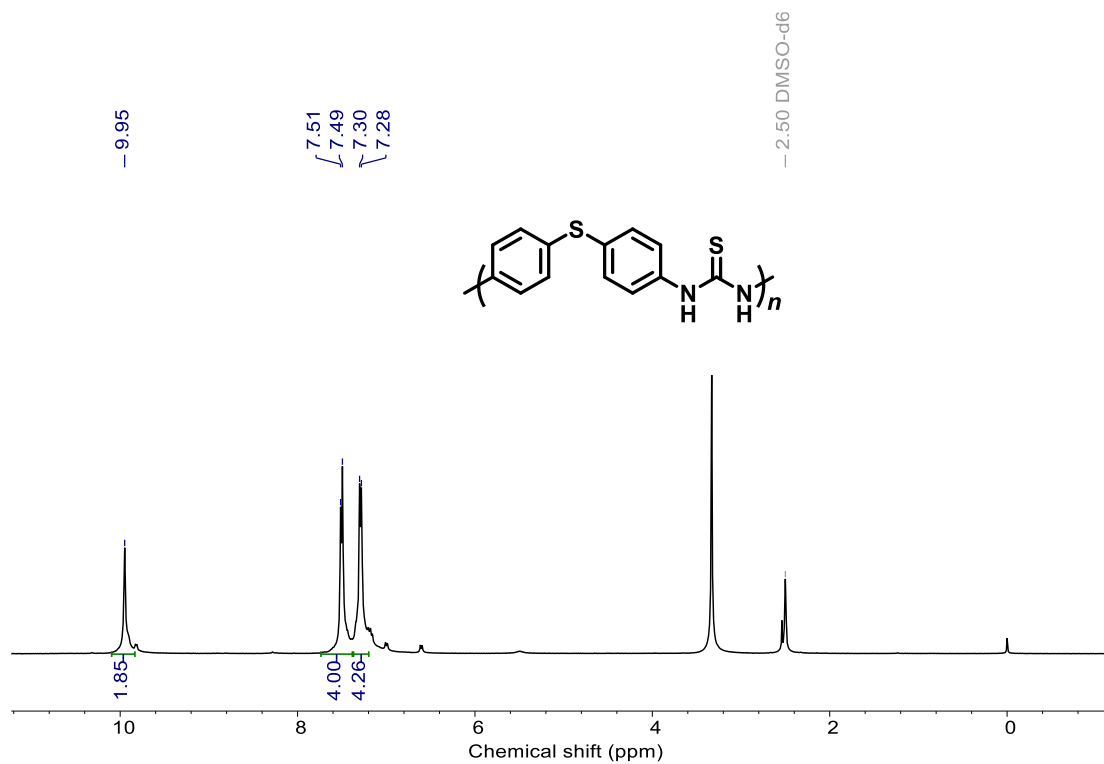

**Figure S49.** <sup>1</sup>H NMR spectrum of P3 in DMSO-*d*<sub>6</sub>.

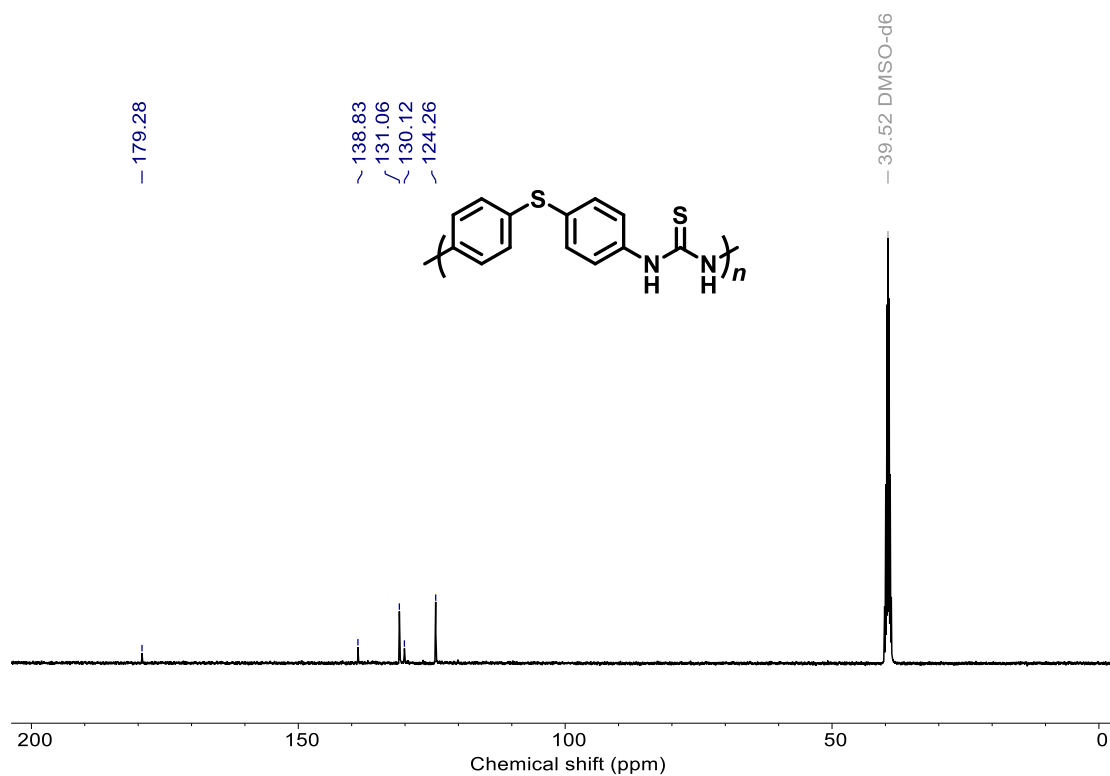

**Figure S50.** <sup>13</sup>C NMR spectrum of P3 in DMSO-*d*<sub>6</sub>.

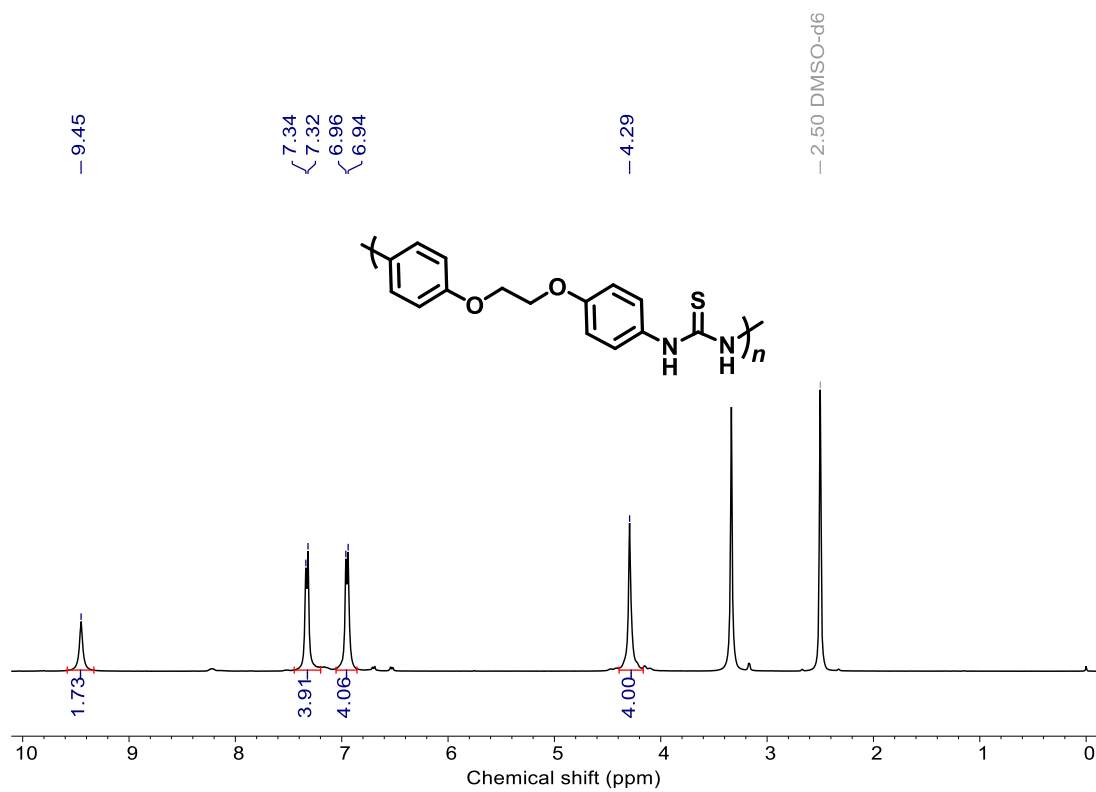

**Figure S51.** <sup>1</sup>H NMR spectrum of P4 in DMSO-*d*<sub>6</sub>.

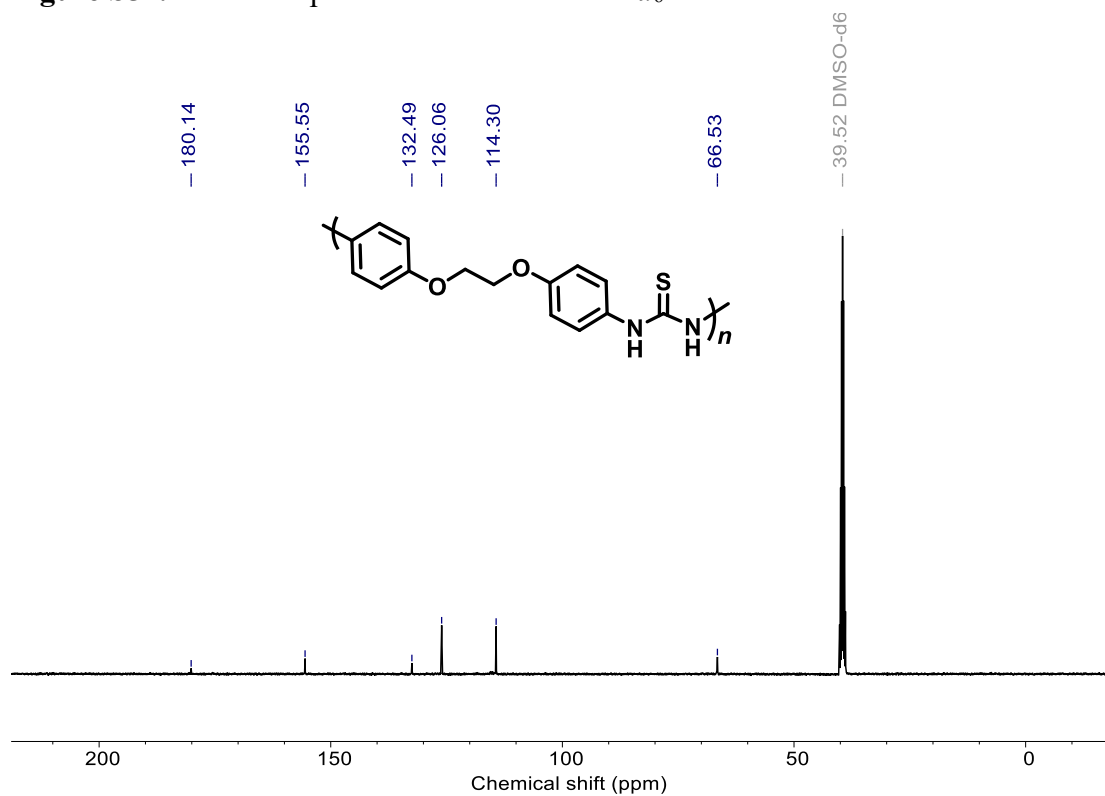

**Figure S52.** <sup>13</sup>C NMR spectrum of P4 in DMSO-*d*<sub>6</sub>.

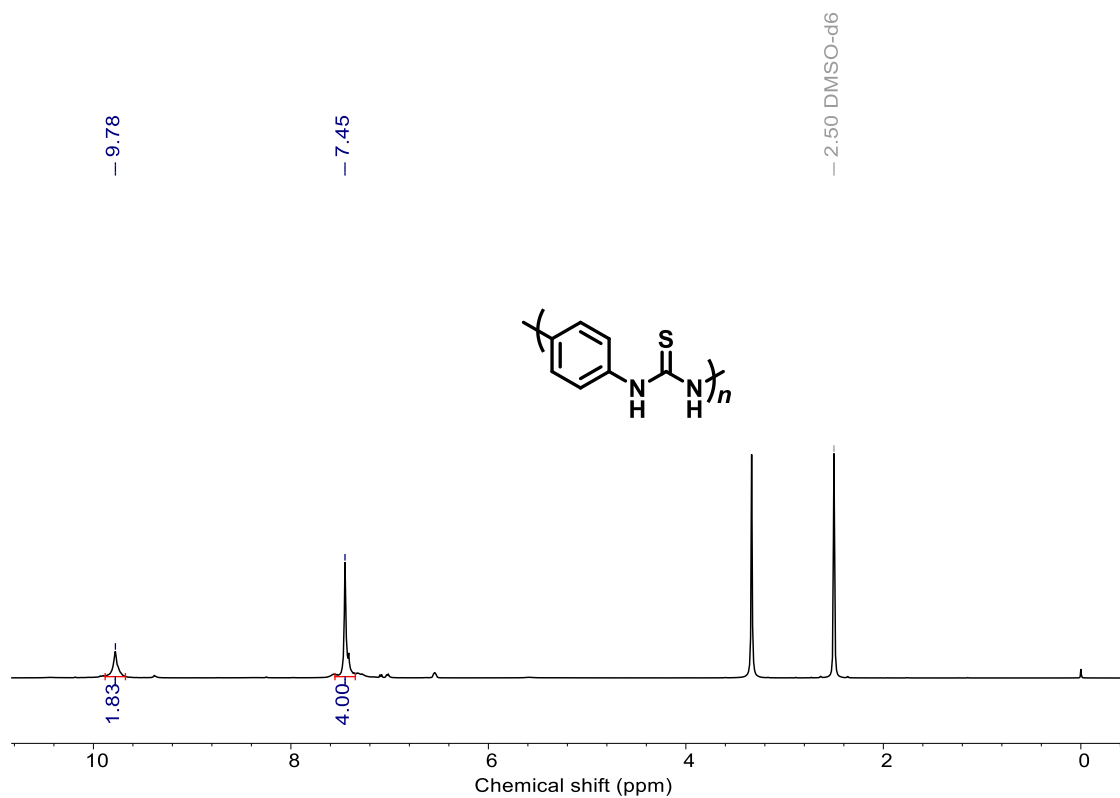

**Figure S53.**  $^1\text{H}$  NMR spectrum of **P5** in  $\text{DMSO-}d_6$ .

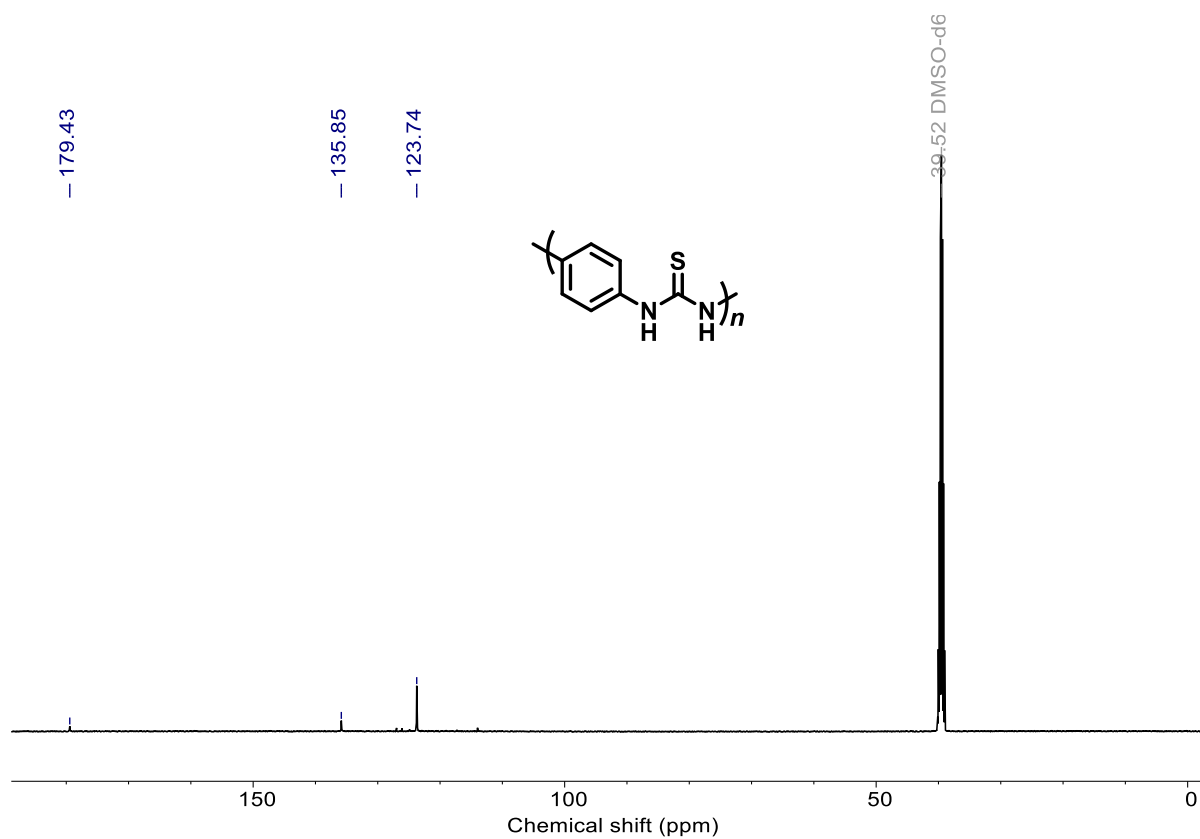

**Figure S54.**  $^{13}\text{C}$  NMR spectrum of **P5** in  $\text{DMSO-}d_6$ .



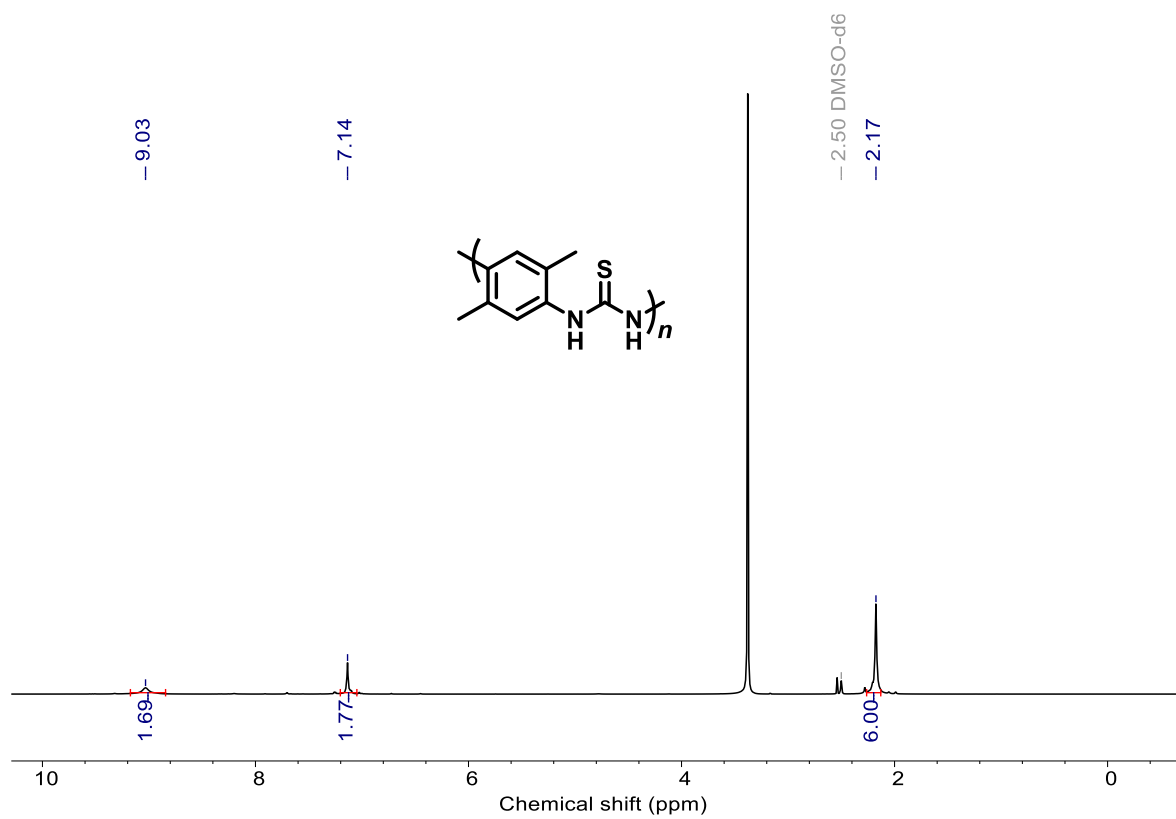

**Figure S55.**  $^1\text{H}$  NMR spectrum of **P6** in  $\text{DMSO-}d_6$ .

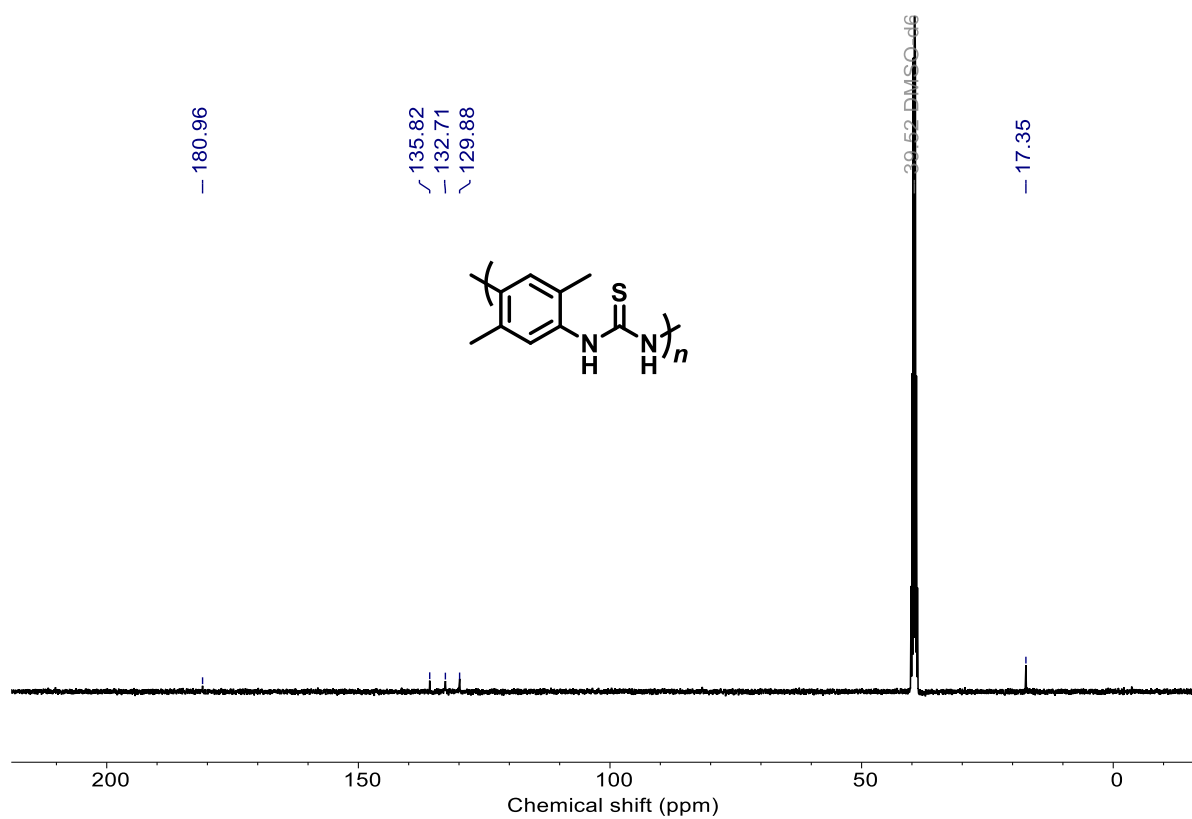

**Figure S56.**  $^{13}\text{C}$  NMR spectrum of **P6** in  $\text{DMSO-}d_6$ .

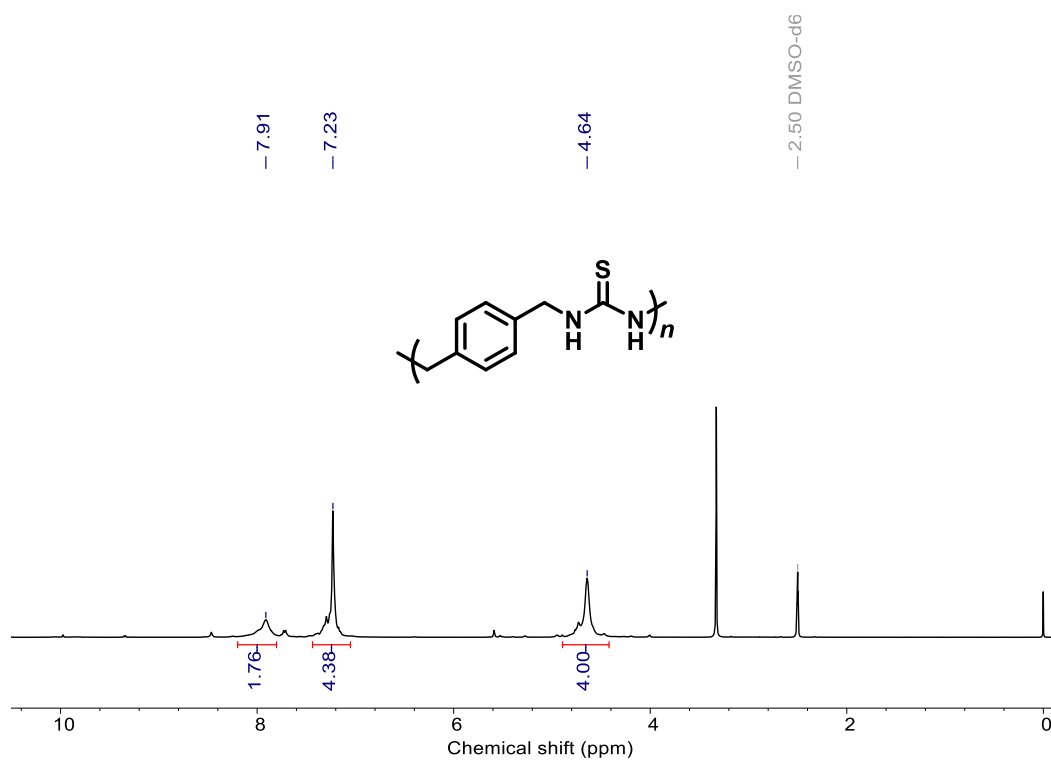

**Figure S57.** <sup>1</sup>H NMR spectrum of P7 in DMSO-*d*<sub>6</sub>.

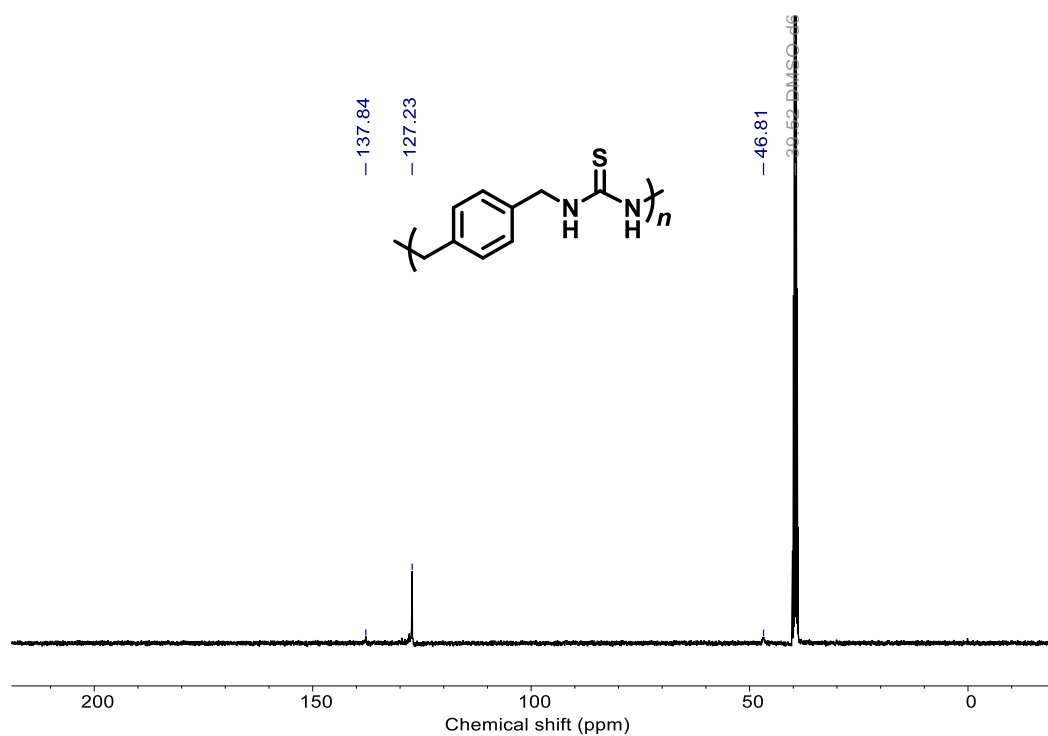

**Figure S58.** <sup>13</sup>C NMR spectrum of P7 in DMSO-*d*<sub>6</sub>.

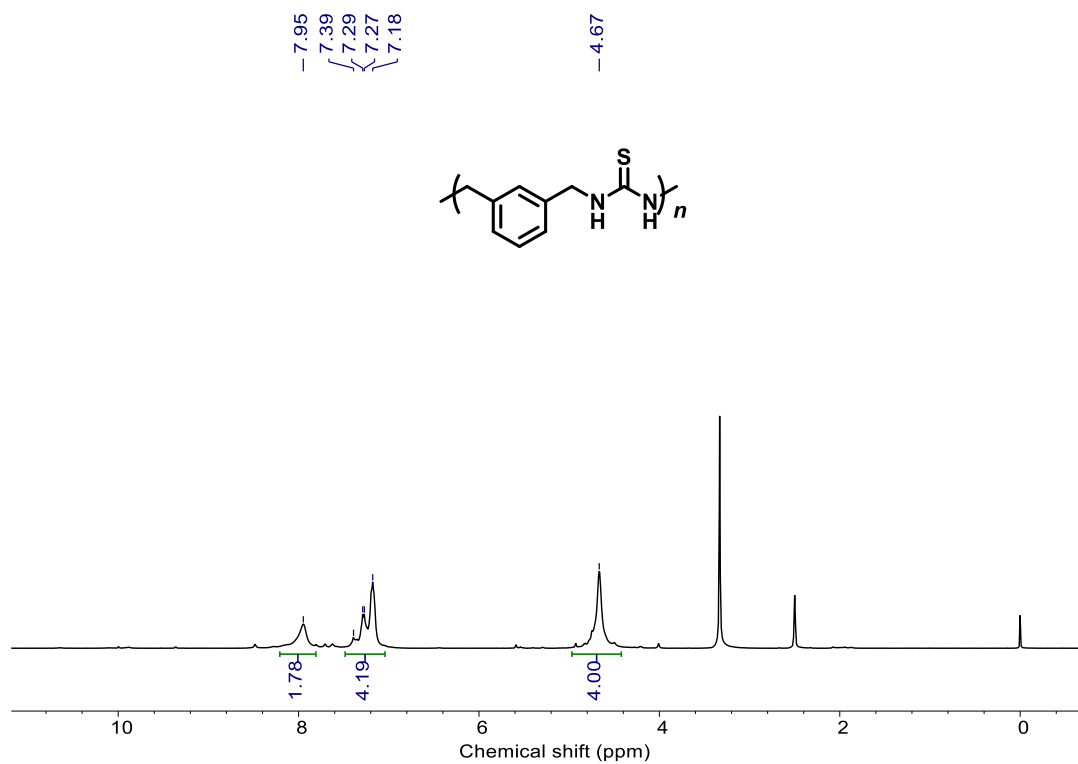

**Figure S59.** <sup>1</sup>H NMR spectrum of **P8** in DMSO-*d*<sub>6</sub>.

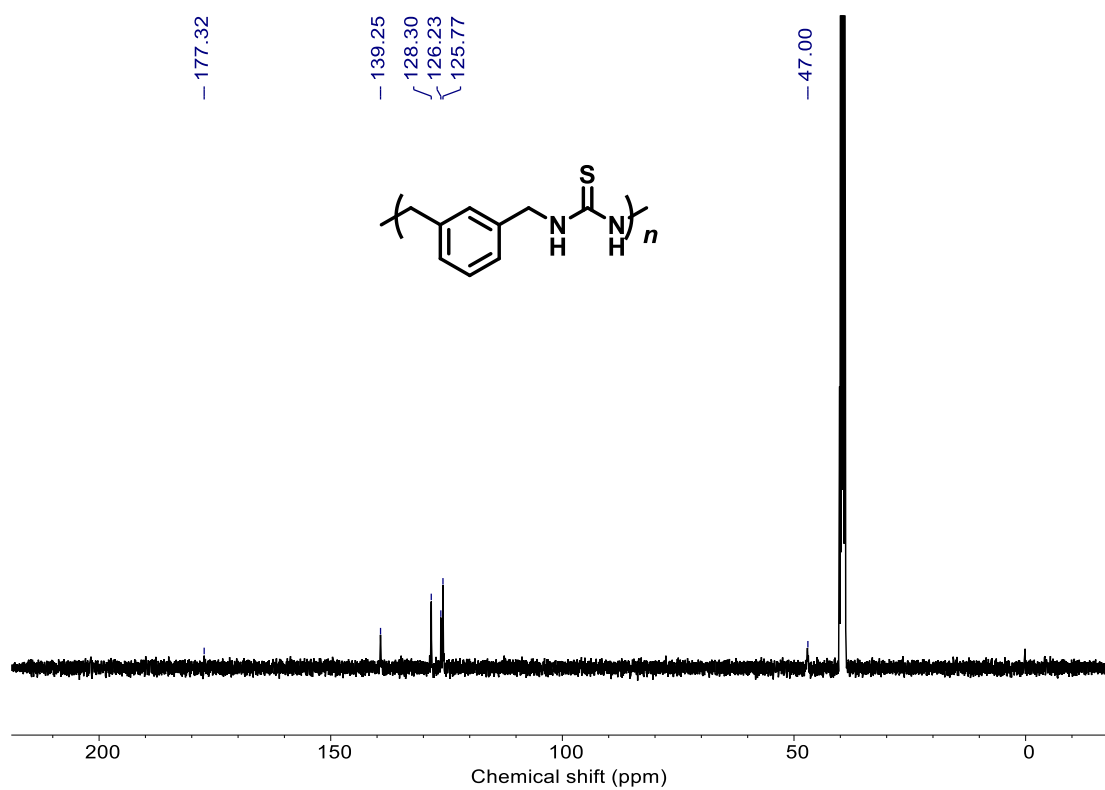

**Figure S60.** <sup>13</sup>C NMR spectrum of **P8** in DMSO-*d*<sub>6</sub>.

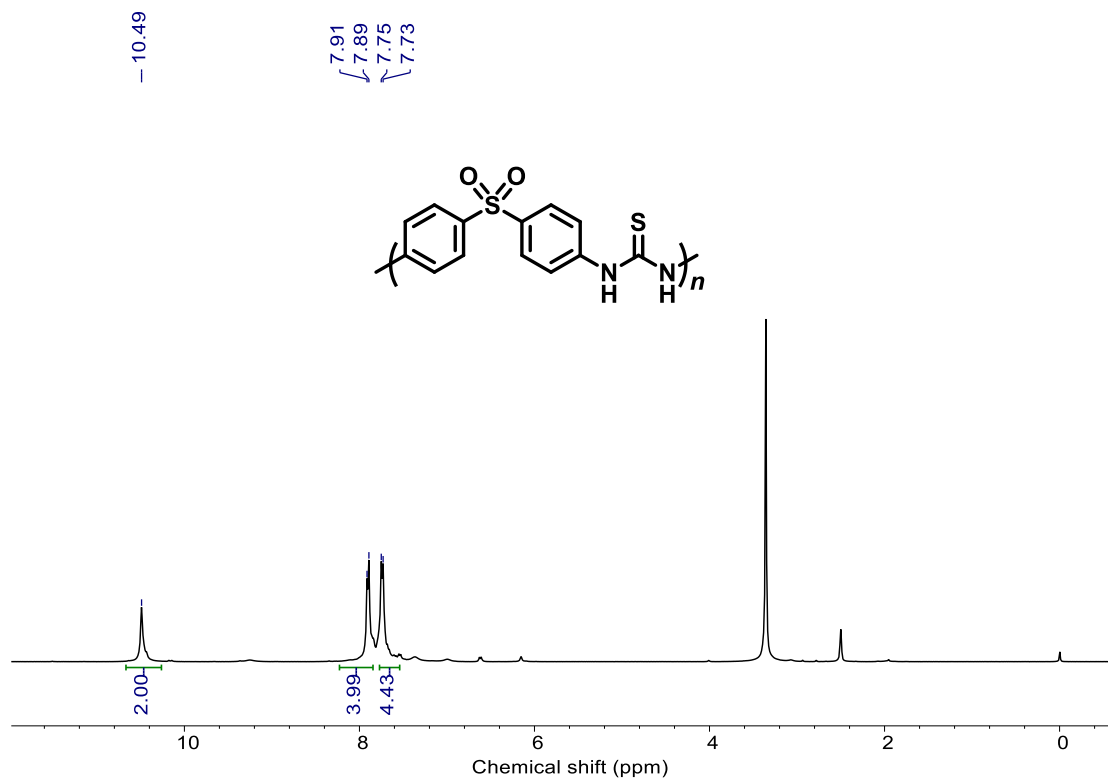

**Figure S61.**  $^1\text{H}$  NMR spectrum of **P9** in  $\text{DMSO-}d_6$ .

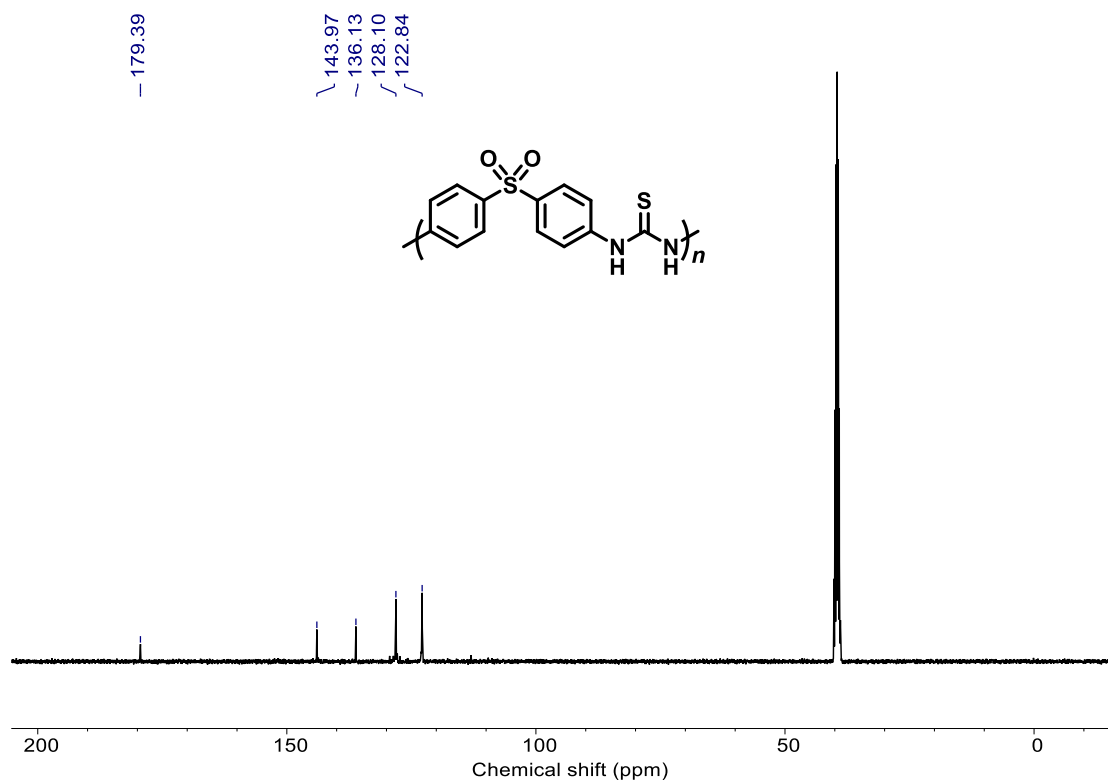

**Figure S62.**  $^{13}\text{C}$  NMR spectrum of **P9** in  $\text{DMSO-}d_6$ .

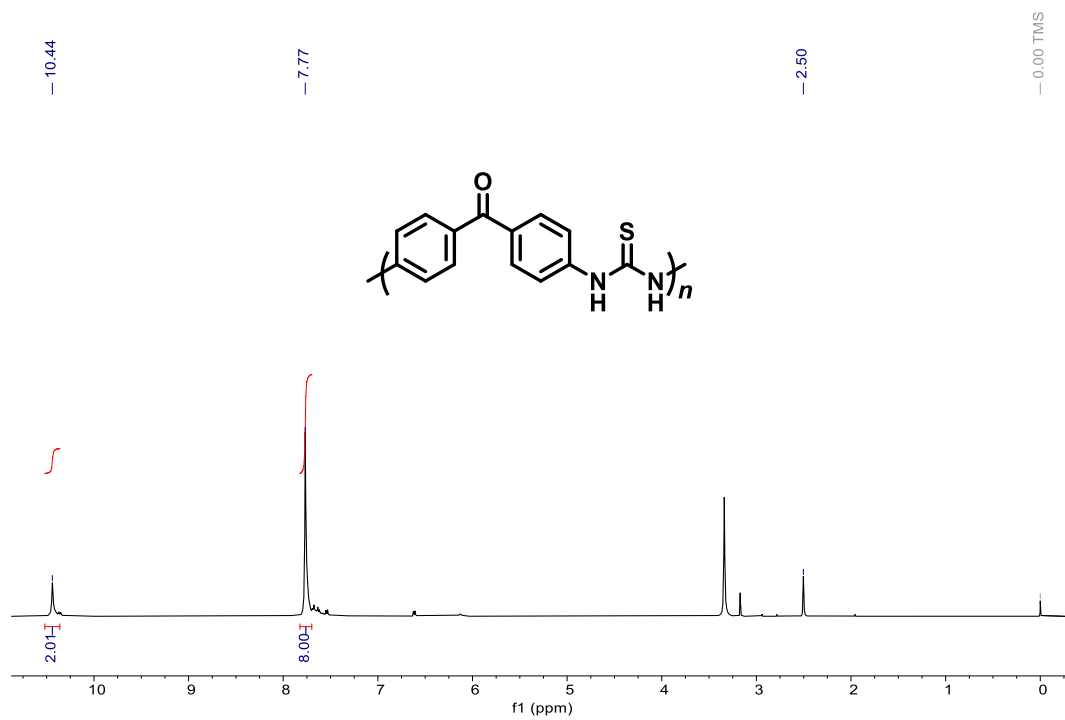

**Figure S63.** <sup>1</sup>H NMR spectrum of P10 in DMSO-*d*<sub>6</sub>

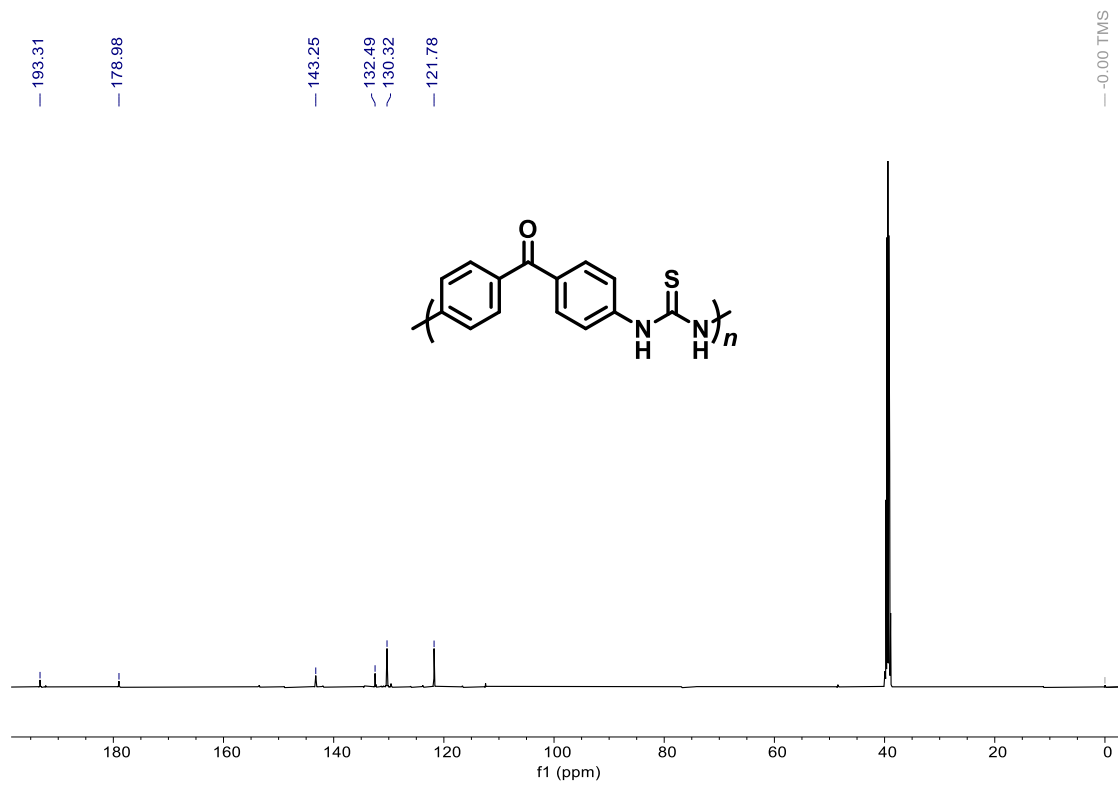

**Figure S64.** <sup>13</sup>C NMR spectrum of P10 in DMSO-*d*<sub>6</sub>.
